# Supplementary material for: Pain and other complications of pelvic mesh: a systematic review of qualitative studies and thematic synthesis of women’s accounts
Source: PubMed Central journal article supplement (PMC11149113; doi:10.1136/bmjopen-2024-085879), 2024-06-03
Supplement: bmjopen-2024-085879.draft_revisions.pdf [file bmjopen-2024-085879.draft_revisions.pdf]

# BMJ Open

BMJ Open is committed to open peer review. As part of this commitment we make the peer review history of every article we publish publicly available.

When an article is published we post the peer reviewers' comments and the authors' responses online. We also post the versions of the paper that were used during peer review. These are the versions that the peer review comments apply to.

The versions of the paper that follow are the versions that were submitted during the peer review process. They are not the versions of record or the final published versions. They should not be cited or distributed as the published version of this manuscript.

BMJ Open is an open access journal and the full, final, typeset and author-corrected version of record of the manuscript is available on our site with no access controls, subscription charges or pay-per-view fees (<http://bmjopen.bmj.com>).

If you have any questions on BMJ Open's open peer review process please email [info.bmjopen@bmj.com](mailto:info.bmjopen@bmj.com)

# BMJ Open

## **Pain and other complications of pelvic mesh: thematic synthesis of women's accounts**

|                               |                                                                                                                                                         |
|-------------------------------|---------------------------------------------------------------------------------------------------------------------------------------------------------|
| Journal:                      | <i>BMJ Open</i>                                                                                                                                         |
| Manuscript ID                 | bmjopen-2024-085879                                                                                                                                     |
| Article Type:                 | Original research                                                                                                                                       |
| Date Submitted by the Author: | 28-Feb-2024                                                                                                                                             |
| Complete List of Authors:     | Williams, Amanda; UCL, Psychology and Language Sciences<br>Lodato, Mary; independent researcher<br>McGrigor, Honor; UCL, Psychology & Language Sciences |
| Keywords:                     | QUALITATIVE RESEARCH, Urogynaecology < UROLOGY, Urinary incontinences < UROLOGY, Adverse events < THERAPEUTICS, Chronic Pain                            |
|                               |                                                                                                                                                         |

SCHOLARONE™  
Manuscripts

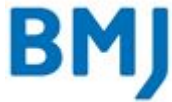

I, the Submitting Author has the right to grant and does grant on behalf of all authors of the Work (as defined in the below author licence), an exclusive licence and/or a non-exclusive licence for contributions from authors who are: i) UK Crown employees; ii) where BMJ has agreed a CC-BY licence shall apply, and/or iii) in accordance with the terms applicable for US Federal Government officers or employees acting as part of their official duties; on a worldwide, perpetual, irrevocable, royalty-free basis to BMJ Publishing Group Ltd ("BMJ") its licensees and where the relevant Journal is co-owned by BMJ to the co-owners of the Journal, to publish the Work in this journal and any other BMJ products and to exploit all rights, as set out in our [licence](#).

The Submitting Author accepts and understands that any supply made under these terms is made by BMJ to the Submitting Author unless you are acting as an employee on behalf of your employer or a postgraduate student of an affiliated institution which is paying any applicable article publishing charge ("APC") for Open Access articles. Where the Submitting Author wishes to make the Work available on an Open Access basis (and intends to pay the relevant APC), the terms of reuse of such Open Access shall be governed by a Creative Commons licence – details of these licences and which [Creative Commons](#) licence will apply to this Work are set out in our licence referred to above.

Other than as permitted in any relevant BMJ Author's Self Archiving Policies, I confirm this Work has not been accepted for publication elsewhere, is not being considered for publication elsewhere and does not duplicate material already published. I confirm all authors consent to publication of this Work and authorise the granting of this licence.

1  
2  
3 **Pain and other complications of pelvic mesh: thematic synthesis of women's accounts**  
4

5 Amanda C de C Williams (0000-0003-3761-8704), Mary Lodato (0009-0005-7476-6679), Honor  
6 McGrigor (0009-0005-4701-9133)  
7

8 Amanda Williams professor Research Department of Clinical Educational & Health Psychology  
9 University College London London WC1E 6BT UK Mary Lodato independent researcher Kettering,  
10 Northants UK Honor McGrigor research assistant Research Department of Clinical Educational &  
11 Health Psychology University College London London WC1E 6BT UK  
12  
13

14 Corresponding author: Dr A C de C Williams, amanda.williams@ucl.ac.uk  
15  
16  
17  
18  
19  
20  
21  
22  
23  
24  
25  
26  
27  
28  
29  
30  
31  
32  
33  
34  
35  
36  
37  
38  
39  
40  
41  
42  
43  
44  
45  
46  
47  
48  
49  
50  
51  
52  
53  
54  
55  
56  
57  
58  
59  
60

For peer review only

## Abstract

**Objectives** Synthesis of the experience of women with pain from pelvic or vaginal mesh, or after its removal, to identify the extent and impact of pain-related problems, and to formulate psychological aspects of pain.

**Design** Systematic search and thematic analysis of qualitative studies of pain from pelvic or vaginal mesh, or mesh removal, in women over 18 years old. Studies could involve individual interviews, focus groups, free text as part of a written survey response, or written or oral contributions to formal enquiries.

**Data sources** Medline, Embase, and PsycInfo from inception to April 26 2023, with citation chaining and no language restriction.

**Review methods** Line by line coding of participant quotations and study author statements provided multiple codes subsequently grouped into sub-themes and themes. These were scrutinised and discussed by a focus group of mesh-injured women to comment on omissions, emphasis, and overall coherence.

**Results** The 2292 results of the search produced nine eligible studies, with seven to 752 participants, a total of around 2000. Four recruited totally or partially from patients, four totally or partially from mesh advocacy groups, and two were national enquiries (UK and Australia). Four major themes were developed: Broken body, broken mind; Distrust of doctors and medical industry; Broken life; and Keeping going – a changed future, with a sub-theme of fear of future problems linking the first two. Psychological content mainly concerned loss of trust in medical care, leaving women unsupported in facing an uncertain future. Mesh-injured women strongly endorsed the findings and terms in which they were summarised.

**Conclusions** Pain and other problems associated with pelvic mesh are profound and far-reaching for women affected. Worse, they feel subject to continued gaslighting, including denial of their mesh-related problems and dismissal of their concerns about continued use of mesh.

**Registration** PROSPERO, registration number CRD42022330527

## Introduction

The use of synthetic mesh to repair pelvic organ prolapse (POP) or for stress urinary incontinence (SUI), both relatively common conditions in women, proliferated under weak regulation and without clinical trials, drawing instead on successful use of mesh in hernia repair.<sup>1</sup> An early review<sup>2</sup> listed complications including erosion, fistula, infection, chronic pain, and dyspareunia, and cited the 2008 US Food & Drug Administration recommendations to “be vigilant for potential adverse events” and to inform patients of possible serious complications. Two small systematic reviews<sup>3,4</sup> on mesh surgery for POP and SUI found adverse effects were poorly recorded and follow-up inadequate, so both recommended a conservative approach. Guidelines published between 2015 and 2017 reported weak stakeholder (particularly patient) involvement, and inadequate declaration of competing interests.<sup>5</sup>

Pelvic mesh insertion was halted in the UK in 2018 and US in 2019. Reports of serious problems, particularly pain, reached public attention (e.g. <sup>6,7</sup>), generating mass legal action in the US. Complication rates from UK hospital data were estimated as 9.8% - 12.8% over 5 years of follow-up.<sup>8</sup> Several studies of women who had undergone mesh insertion<sup>9-12</sup> suggested that they were poorly informed about adverse effects or alternative treatments, with internet information of variable quality.<sup>13</sup> Women who developed problems with mesh often had considerable difficulty convincing doctors of their symptoms and that mesh was the cause, or obtaining adequate care.<sup>14,15</sup> Formal enquiries in the UK (The Cumberlege Report),<sup>16</sup> Scotland<sup>17</sup> and Australia<sup>18</sup> recorded widespread and severe distress and substantial shortcomings in care. A systematic review of mesh complications<sup>19</sup> found only one prospective study, and very varied outcomes of pain and other symptoms, and little on quality of life. A qualitative systematic review<sup>14</sup> described how discounting of women’s experience compounded the psychological harm from mesh.

More recent studies and rich material from national enquiries provide data for a larger and more critical meta-synthesis of qualitative studies. A particular focus here was the relationship of pain to mesh-associated disabilities: the standard model of pain, developed in musculoskeletal patient populations, identifies fears of increased pain or damage as the basis of extensive activity avoidance that constitutes disability,<sup>20,21</sup> but the extent to which this applies to visceral pain is uncertain.

## Methods

This literature review was registered with the International Prospective Register of Systematic Reviews (PROSPERO CRD42022330527). In preparation for the review, the researchers discussed mesh related pelvic pain and key literature with clinicians involved in treatment, and consulted an academic librarian about search terms and databases.

### *Search strategy*

On 24<sup>th</sup> October 2022, a comprehensive literature search of Medline, Embase, and PsycInfo was conducted, and updated by repeating it on 26<sup>th</sup> April 2023 (see supplementary data for search terms). Following each search, citation chaining was used.

### *Inclusion and exclusion criteria*

The inclusion criteria were: (1) qualitative research on pain from pelvic or vaginal mesh, or pain after mesh removal; (2) in adults (18 and over); (3) in peer-reviewed journals or publicly available PhD theses. No limitations were placed on language or date of publication.

### *Study selection*

1  
2  
3 Records from the searches and citation chaining were exported to Endnote X9.3.3. and deduplicated  
4 using automated then manual methods. The remaining records were screened (by HM) on title and  
5 abstract, and ineligible records removed; the lead researcher (AW) checked a 5% random sample of  
6 these rejected records. Possible records were retrieved as full texts, read by both researchers  
7 independently to decide on inclusion or reasons for exclusion.  
8  
9

### 10 ***Evaluation of studies***

11 The characteristics of studies were appraised using an amalgamation of the CASP<sup>22</sup> and COREQ<sup>23</sup>  
12 quality assessment tools (see supplementary information) from which essentially similar items had  
13 been removed. Both researchers rated the included studies independently and discussed their  
14 ratings to achieve consensus.  
15  
16

### 17 ***Data synthesis***

18 The data were treated according to Thomas and Harden's thematic synthesis method.<sup>24</sup> Using NVivo  
19 12 1.6.1, one researcher (HM) read all the texts, generated initial codes using inductive methods,  
20 then coded Results (including direct quotations) and Discussions of included studies, line by line.  
21 These codes were used by the other researcher (AW) on 5 of the 9 studies. This enabled collapse of  
22 many codes to produce a more compact set. Both researchers generated sub-themes and themes  
23 from these codes.  
24  
25  
26

### 27 ***Positionality and reflexivity***

28 Given the subjective bias that affects data analysis, we provide the following information for readers  
29 to consider. AW is an academic and clinical psychologist with over 35 years' experience of clinical  
30 and research work in chronic pain, including chronic pelvic pain. She questions the fit of the fear and  
31 avoidance model in research on or clinical formulation of visceral pains. HM is a research psychology  
32 assistant, with experience in qualitative methods but not in pain. Both researchers aimed for  
33 reflexive processing of data, considering at multiple points whether and how their beliefs and  
34 concerns might influence their decisions. Neither has personal experience of chronic pelvic pain or  
35 mesh.  
36  
37  
38

### 39 ***Patient and public involvement: review by women with experience of mesh***

40 Following analysis of themes and subthemes, the views of women with mesh complications were  
41 sought. This part of the review had approval from the UCL Research Ethics Committee (ref:2182  
42 Amendment 1). An advertisement was circulated via a member of the project's patient and charity  
43 advisory board (PCAB) to an author who is a leading member of an advocacy group that campaigns  
44 for better services and care for women with mesh complications; these collaborators also  
45 distributed information and collected consent from women who volunteered to take part.  
46 Participating women were provided with the full thematic analysis results with 2 days to read them  
47 before taking part in an online meeting, hosted by the PCAB member for pelvic mesh, at which  
48 results were discussed. Notes were taken by the first author of the paper, with a full verbatim  
49 transcription of a recording of the meeting by the PCAB member. Women were recompensed for  
50 their contributions.  
51  
52  
53  
54  
55

## 56 **Results**

57 The 3232 records from the searches and citation chaining were reduced to 2292 by automatic  
58 deduplication (653 records) then manual removal (287 records). Screening of these titles and  
59  
60

1  
2  
3 abstracts removed 2273 ineligible records; there were no disagreements on the sample of rejected  
4 records. The remaining records were discussed, resulting in full text retrieval of 19 potentially  
5 eligible qualitative studies and a further rejection of 4 conference abstracts. Of the 15 remaining, 9  
6 were included (see Figure 1, PRISMA diagram). The excluded studies were two government  
7 reports<sup>17,25</sup> and the transcript of a television documentary<sup>6</sup> that were not designed or reported in the  
8 form of qualitative data; one master's thesis<sup>26</sup> for which we included the published paper;<sup>27</sup> one  
9 study of multiple pelvic surgeries among which accounts of mesh were not distinguishable;<sup>28</sup> and  
10 one use of written evidence to a government enquiry to study women's accounts of communication  
11 about mesh, not addressing pain directly.<sup>29</sup>

12  
13  
14  
15 *Figure 1 about here*

### 16 **Characteristics of studies and participants**

17  
18 The included studies are described in Table 1. Four studies were conducted in the UK,<sup>16,30,31,32</sup> two in  
19 the United States,<sup>33,34</sup> two in New Zealand,<sup>27,35</sup> and one in Australia.<sup>36</sup> Participant numbers varied  
20 from 7 to 752, with a total across the 9 studies approaching (and possibly exceeding) two thousand.  
21 Four studies recruited from patient populations exclusively<sup>27,31,33,34</sup> and one partially;<sup>32</sup> four from  
22 advocacy groups for affected women, two exclusively<sup>30,35</sup> and two partially;<sup>16,32</sup> and two drew on  
23 material from national enquiries.<sup>16,36</sup> Where non-patient participants such as carers and clinicians  
24 also provided material for the report,<sup>16,36</sup> we used only submissions from affected women or  
25 representatives of mesh advocacy groups. Five studies used semi-structured<sup>27,30,32,34</sup> or structured<sup>33</sup>  
26 interviews; two drew from free text that supplemented questionnaire responses<sup>31</sup> or national  
27 inquiry;<sup>36</sup> one used free text e-mailed responses;<sup>35</sup> and one used transcribed oral responses from  
28 inquiry hearings and written responses to drafts of the report.<sup>16</sup>

29  
30  
31  
32 Seven studies provided information on age, five<sup>27,30,31,33,34</sup> with a mean age in the fifties, and range  
33 from 20 into the eighties; the other two<sup>32,35</sup> provided ranges from the thirties into the seventies.  
34 Only three provided information on ethnicity, all majority or entirely white (European, non-  
35 Hispanic),<sup>27,32,34</sup> but it is likely that the other studies were similar in this respect. Four studies  
36 recruited from clinical populations<sup>27,31,33,34</sup> and one partially so;<sup>32</sup> two through social media support  
37 groups;<sup>30,35</sup> and two issued open invitations to contribute to national inquiries.<sup>16,36</sup> As far as could be  
38 ascertained, two studies recruited women with mesh still in place,<sup>31,35</sup> and the remainder recruited a  
39 mix of women with mesh in place, mesh partially removed, mesh fully removed, or having had  
40 unspecified revision surgery.<sup>34</sup>

41  
42  
43  
44 *Table 1 about here*

### 45 **Aims and methods of included studies**

46  
47 Information collected using the combined COREQ/CASP form is summarized here (see  
48 supplementary information for detail). Six studies aimed to describe the experience of women with  
49 mesh complications, five<sup>27,30,32,34,35</sup> on the basis that it had been inadequately addressed in the  
50 literature, and one to follow up "optimized" specialist treatment of complications.<sup>33</sup> The UK inquiry<sup>16</sup>  
51 also aimed to recruit women with mesh-related complications. The remaining two papers aimed  
52 rather to capture varied experiences from women after mesh surgery: one using written inquiry data  
53 to explore experience "through a biopsychosocial lens",<sup>36</sup> the other to explore "health-related  
54 issues" in a more "balanced" way than those that focused on mesh complications.<sup>31</sup> It should be  
55 noted that the conflicts of interest for this latter study disclose that three of the eight authors had  
56 associations with mesh producers.



Two studies<sup>34,36</sup> combined deductive and inductive approaches; four were inductive,<sup>27,31,32,35</sup> one implied an inductive approach but some themes rather closely resembled question topics,<sup>30</sup> one simply described “low level inference” in its analysis,<sup>33</sup> and the inquiry<sup>16</sup> took a transparent approach to reporting but did no formal qualitative analysis. Two studies<sup>27,32</sup> and one inquiry<sup>16</sup> discussed and revised their findings with the help of participants.

Some methodological details are of interest. Of those studies that interviewed participants, five used female interviewers<sup>27,30,32,34,35</sup> and another probably did so but was unclear;<sup>33</sup> one inquiry<sup>16</sup> had a female chair with two male panel members and a female secretary. One study in which the researcher herself had experience of mesh surgery disclosed this to participants;<sup>27</sup> her paper discusses reflexivity and bias at some length. In another study,<sup>35</sup> one of the researchers was a health advocate who belonged to the online mesh group from which participants were recruited, but did not explore the implications of this for data or analysis. Where participants were patients treated by authors,<sup>31,33</sup> possibly <sup>34</sup>, there is a lack of transparency about potential effects on recruitment, data collection and data analysis. The inquiry<sup>16</sup> carried out in person by a panel of experts in healthcare and in public enquiry processes describes its efforts to ensure transparency and openness, and its independence from governmental or industry influence.

### ***Thematic synthesis***

Initial coding of content of results and discussions of all studies, drawing both on directly reported participant comments and on researcher commentary, provided 101 codes. These were collapsed and grouped by the researchers collaboratively. Subthemes were named as far as possible using quotations. The final themes and subthemes, with content, are shown in Table 2, and the studies contributing in Table 3.

*Table 2 about here*

There was a strong sense of double betrayal in women’s accounts: feeling misled about the likely success and possible harms of the original mesh insertion surgery, and not offered alternative nonsurgical interventions; then not being believed or treated with adequate care when they reported problems post-surgically. The main themes, **broken body, broken mind, and broken life** reflected in some detail the extent and severity of adverse effects from the mesh. Chronic pain was prominent, as was incontinence and other bladder, bowel, and wider health problems. These were interwoven with frustration at the limitations imposed by pain and incontinence, and a powerful sense of loss of family and social relationships. Closely related to both of these was the sense of **distrust of doctors and the medical industry** engendered by the original decision about mesh insertion and by the uncaring response to symptoms and problems that followed. Some women felt deliberately misled by doctors, mostly surgeons, but many contextualised their experience in lack of knowledge and information among the medical profession, and in their fallibility. Despite a few positive comments about interactions with doctors, the avoidability of the disastrous experience left many women bitter about having agreed to mesh insertion.

A fourth and somewhat separate theme concerned adjustment to the situation, **keeping going – a changed future**. This contained ways that women had made meaning from their experience, such as activism on behalf of and advocacy for women with mesh complications. Some of the comments about positive experience were apparently spontaneous, but others were elicited by leading questions (e.g. <sup>30</sup>).

*Table 3 about here*

### **Review by women with experience of mesh**

Seven women with complications of mesh took part in the online meeting, plus another who facilitated the meeting arrangements and transcribed the meeting content. Some of the women had undergone mesh removal and others had not; for most, symptoms persisted or had worsened. Their overall impression was that the themes were familiar to them and described their experiences; no major areas were raised that were missing, and they did not think that the negativity of the themes was unrepresentative. The women endorsed in particular anger about the original surgery, about treatment, and about subsequently about not being believed when they presented with complications, and still not being taken seriously when they sought medical help, even unrelated to mesh. This they associated with a general dismissal of women's health problems, and the defensiveness of medicine when the possibility of iatrogenic harm was raised. All these contributed to a loss of trust and confidence in the institution of medicine. There was some concern that the themes did not adequately articulate the moral wrong of having been "mutilated by the medical industry".

Further, they were concerned about lack of accountability for money spent on the recommendations of the UK Cumberlege Inquiry<sup>16</sup> that had been accepted by the government. They were sceptical about the adequacy of staff training in the nine specialist centres now responsible for the care of women with mesh complications, and about surgeons removing mesh who had previously been committed to implanting it. Women had hoped for the establishment of holistic and integrated care of the sort offered in some cancer services, but experienced rather a fragmentary service, little follow-up after removal. They were aware of continued pressure from some surgeons to lift the current ban on pelvic mesh. Alongside these deeply distressing experiences, women also gave credit to the GPs and surgeons they had encountered who were concerned and willing to listen and learn. Several women had pursued medicolegal cases, but some necessary medical examinations had not been performed by surgeons who were expert in mesh-related problems. Other women had felt that internal examinations and psychiatric interviews were requested in order to discourage their litigation.

Women were curious about and some were critical of research methodologies; they emphasised how important it was to know what questions were asked when analyzing the answers that provided data for qualitative studies: that they might have been designed to elicit positive responses about mesh. They also raised the issue of vested interests of some clinician-researchers who benefited from ongoing relationships with mesh companies, and other hidden agendas (such as lifting the ban on pelvic mesh) informing research design and findings.

### **Discussion**

Three of the four themes were overwhelmingly negative in emotional tone; only the last theme, *Keeping going – a changed future*, had a more varied tone, but was extracted from fewer studies (see figure 2). Nevertheless, it was endorsed by the women with mesh complications who discussed the findings and described how they directed their anger about their experience into helping other women with mesh complications, and that meeting other women with similar experience had been hugely important, far beyond validation of their current difficulties.

The destructive impact of mesh complications, and in some cases further impact of mesh removal, was evident across somatic, emotional, family, social and vocational domains of life, with a deep sense of irreversible loss. The two themes *Broken body*, *broken mind*, and *Broken life*, attest to

widespread adverse effects of the pelvic mesh; one of the women reviewing the results commented that her sense of being female had been destroyed by the experience. When major health problems occur, people often ask themselves why it happened to them, and whether it could have been prevented.<sup>37</sup> This provided the basis for the third main theme, *Distrust of doctors and medical industry*. Not only did women feel misinformed about the options for surgery when they first presented with prolapse or stress incontinence, but also that the risks of surgery had not been known or communicated to them. Worse, when they experienced complications of mesh, their symptoms and distress were frequently dismissed, even denied, by doctors. A study of surgeons' reasons for continuing mesh insertion showed a focus on repairing anatomy rather than patient experience,<sup>38</sup> deflection of blame,<sup>39</sup> and a lack of evidence, since no denominator of total mesh insertions existed for estimating harms.<sup>40</sup> While doctors themselves had been inadequately informed of risks by an industry that showed little interest in accurate estimation of outcomes,<sup>40</sup> many women also experienced their doctors as being uninterested in the outcomes of surgery they had performed, or (in primary care) recommended. The belief that women imagine, exaggerate, and fail to manage their symptoms persists throughout healthcare,<sup>41</sup> and these women felt additionally disqualified because their problems were iatrogenic.

From a psychological point of view, the problem of pain was overshadowed by many other mesh-related symptoms and losses; there was no evidence that as in the standard model, women's disabilities were the outcome of unwarranted fears for their health and overcautious decisions about activity, although of course data were not collected specifically to test this model. It would be a serious error to interpret women's accounts as catastrophic overestimation of threat from innocuous events.<sup>42</sup> It is not possible to assert on the basis of these findings that pain was a predominant cause of disability, but it was a common reason for seeking medical help among women experiencing complications.

### ***Strengths and limitations***

There are some limitations to this metasynthesis that arise from characteristics of the studies included. Despite a search without a language limit, studies were all from high income English-speaking countries, but enthusiasm for mesh insertion persists in high and middle income countries.<sup>43</sup> Disclosure of interests was inadequate in several studies, including those that declared some, and there was a general lack of reflexivity from clinician-researchers about how their training and outlook might affect their questions and the answers they obtained, particularly when interviewees were their own patients. Themes not represented in individual studies could not appear in the metasynthesis: however, the women with mesh complications who were consulted about the metasynthesis findings did not identify any major gaps. The women who contributed were all from the UK: a wider sample would have been desirable. There is always subjectivity in coding and construction of themes from codes, and a statement of reflexivity and positionality does not remove subjectivity, only allows readers to judge bias for themselves without a formal measure.

We have moderate to high confidence in our findings. Using the CERQual categories of methodological limitations, coherence of findings, adequacy of data, and relevance of findings,<sup>44</sup> we note methodological shortcomings in not having a larger team to contribute to the analysis, a weakness only partly mitigated by involving a group of mesh-injured women, and although samples in several studies were large and data rich in most, some populations are poorly represented in the nine included studies, compromising data adequacy.

### ***Implications of the review***

The industry implications have been addressed in the national enquiries,<sup>16,36</sup> and by mass legal action in the USA: permission to extend the use of mesh was far too easily granted,<sup>40,45</sup> and systematic reporting of adverse effects was weak or absent or relied on legal records.<sup>46</sup> The clinical shortcomings are summarised as lack of post-marketing surveillance, poor understanding of the pelvic floor and of pelvic-floor-related disorders, and inadequate medical training of non-mesh

1  
2  
3 management of POP and SUI.<sup>45</sup> Available information on the internet, when studied in 2019, was of  
4 moderate quality,<sup>13</sup> but it is not known if it is better now. Development and user-testing of  
5 information resources is underway (e.g.<sup>47</sup>) but on a small scale.  
6

7 Other clinical implications are not unique to mesh but concern gender bias in medicine that leads to  
8 disbelief or disregard of women's symptoms, and punitive interactions with women who challenge  
9 routine medical practice or who seek redress. The loss of trust expressed in the studies, and in the  
10 consultation with women with mesh complications, was shocking. It is only in New Zealand that  
11 governmental initiatives have addressed this directly, using restorative justice methods.<sup>25</sup> Lastly, the  
12 standard model of chronic pain disability as arising more in unwarranted fears than in pain itself fails  
13 to describe these findings, and application to pelvic mesh complications would only exacerbate the  
14 gaslighting of women with painful mesh complications.  
15

## 16 17 Acknowledgements

18  
19 We recognise the help of our PCAB member, and the courage of the participants who took part in  
20 the discussion of results, sharing their lived expertise, their personal journeys, and their trauma, in  
21 the hope that their voices would generate a deeper understanding in the literature of the harm done  
22 by mesh in the UK. We are grateful to clinicians who gave us their time, and to our librarian  
23 colleague.  
24

25  
26 **Data sharing:** Full study-by-study coding is available from the authors on request to  
27 amanda.williams@ucl.ac.uk.  
28

## 29 30 References

- 31  
32 1 Heneghan CJ, Goldacre B, Onakpoya I, et al. Trials of transvaginal mesh devices for pelvic  
33 organ prolapse: a systematic database review of the US FDA approval process. *BMJ Open*  
34 2017;7:e017125. doi: 10.1136/bmjopen-2017-017125  
35
- 36 2 Muffly TM, Barber MD. Insertion and removal of vaginal mesh for pelvic organ prolapse. *Clin*  
37 *Obs Gynecol* 2010;53(1):99-114. doi: 10.1097/GRF.0b013e3181cefab8  
38
- 39 3 Baessler K, Christmann-Schmid C, Maher C, et al. Surgery for women with pelvic organ  
40 prolapse with or without stress urinary incontinence. *Cochrane Database Syst Rev*  
41 2018;8(8):CD013108. doi: 10.1002/14651858.CD013108.  
42
- 43 4 Freitas J, Stewart F, Omar MI, et al. Laparoscopic colposuspension for urinary incontinence in  
44 women. *Cochrane Database Syst Rev* 2019;12(12):CD002239. doi:  
45 10.1002/14651858.CD002239.pub4.  
46
- 47 5 Tsiapakidou S, Nygaard CC, Pape J, et al. Evaluation of guidelines on the use of vaginal mesh  
48 implants for pelvic organ prolapse using the AGREE II instrument. *Int J Gynaecol Obstet*  
49 2021;154:400-11. doi: 10.1002/ijgo.13622  
50
- 51 6 BBC Panorama. The operation that ruined my life. 2017.  
52 <https://www.youtube.com/watch?v=mPRns0fG3k>, accessed 07.02.24  
53
- 54 7 Yanagisawa, M, Zimmern P. Topix discussion board: A qualitative insight into the lives of  
55 women affected by tape complications. *Neurol Urodyn* 2012;31(2):274-5.  
56
- 57 8 Keltie K, Elneil S, Monga A, Patrick H, Powell J, Campbell B, Sims AJ. Complications following  
58 vaginal mesh procedures for stress urinary incontinence: an 8 year study of 92,246 women. *Sci Rep*  
59 2017;7:12015. doi: 10.1038/s41598-017-11821-w  
60

- 1  
2  
3 9 Abhyankar P, Uny I, Semple K, et al. Women's experiences of receiving care for pelvic organ  
4 prolapse: a qualitative study. *BMC Womens Health* 2019;19(45). doi: 10.1186/s12905-019-0741-2  
5  
6 10 Hobson DTG, Kinman CL, Gaskins JT, et al. Comparative analyses of attitude, knowledge, and  
7 recollection of preoperative counseling regarding pelvic mesh among women with or without a  
8 mesh-related complication. *Arch Gynecol Obstet* 2021;303:1263-70. doi: 10.1007/s00404-020-  
9 05919-2  
10  
11 11 Loane K, Toozs-Hobson P, Hicks C. Women's experiences of stress incontinence surgery.  
12 *Neurourol Urodyn* 2009;28(7):581-2.  
13  
14 12 Oxlad M, Edwards G, McKinlay KA. Patients' perspectives about doctor-patient  
15 communication regarding transvaginal mesh implant surgery. *Patient Educ Couns* 2022;105:3534-9.  
16  
17 13 Furtado Meinberg M, Cardoso Brandão W, Andrade Werneck R, et al. Evaluation of the  
18 quality of information available on the internet on vaginal meshes. *Eur J Obstet Gynecol Reprod Biol*  
19 2021;264:330-35. doi: 10.1016/j.ejogrb.2021.07.055  
20  
21 14 Motamedi M, Carter SM, Degeling C. Women's experiences of and perspectives on  
22 transvaginal mesh surgery for stress urine incontinency and pelvic organ prolapse: A Qualitative  
23 Systematic Review. *Patient* 2022; 15(2):157-69. doi: 10.1007/s40271-021-00547-7  
24  
25 15 Uberoi P, Lee W, Lucioni A, et al. Vaginal Mesh Survivorship. *Curr Bladder Dysfunct Rep*  
26 2020;15(2):93-9. doi: 10.1007/s11884-020-00581-5  
27  
28 16 Cumberlege J. First do no harm. The report of the independent medicines and medical  
29 devices safety review. 2020. [https://www.immdsreview.org.uk/downloads/IMMDSReview\\_Web.pdf](https://www.immdsreview.org.uk/downloads/IMMDSReview_Web.pdf).  
30 Annex J <https://www.immdsreview.org.uk/downloads/Annexes/Annex-J-Personal-testimonies.pdf>.  
31 Annex K [https://www.immdsreview.org.uk/downloads/Annexes/Annex-K-Oral-Hearing-](https://www.immdsreview.org.uk/downloads/Annexes/Annex-K-Oral-Hearing-Transcripts.pdf)  
32 [Transcripts.pdf](https://www.immdsreview.org.uk/downloads/Annexes/Annex-K-Oral-Hearing-Transcripts.pdf). Accessed 07.02.24.  
33  
34 17 Scottish Government. Transvaginal mesh implants independent review: final report 2017  
35 ([https://www.gov.scot/publications/scottish-independent-review-use-safety-efficacy-transvaginal-](https://www.gov.scot/publications/scottish-independent-review-use-safety-efficacy-transvaginal-mesh-implants-treatment-9781786528711/)  
36 [mesh-implants-treatment-9781786528711/](https://www.gov.scot/publications/scottish-independent-review-use-safety-efficacy-transvaginal-mesh-implants-treatment-9781786528711/)). Accessed 07.02.24.  
37  
38 18 Commonwealth of Australia Senate Community Affairs References Committee. 2018.  
39 Report: Number of women in Australia who have had transvaginal mesh implants and related  
40 matters.  
41 [https://www.aph.gov.au/Parliamentary\\_Business/Committees/Senate/Community\\_Affairs/MeshIm-](https://www.aph.gov.au/Parliamentary_Business/Committees/Senate/Community_Affairs/MeshImplants)  
42 [plants](https://www.aph.gov.au/Parliamentary_Business/Committees/Senate/Community_Affairs/MeshImplants). Accessed 07.02.24  
43  
44 19 Carter P, Fou L, Whiter F, et al. Management of mesh complications following surgery for  
45 stress urinary incontinence or pelvic organ prolapse: a systematic review. *BJOG* 2020;127:28–35. doi:  
46 10.1111/1471-0528.15958  
47  
48 20 Vlaeyen JWS, Crombez G, Linton SJ. The fear-avoidance model of pain. *Pain*  
49 2016;157(8):1588-9. doi: 10.1097/j.pain.0000000000000574  
50  
51 21 Vlaeyen JWS, Linton SJ. Fear-avoidance and its consequences in chronic musculoskeletal  
52 pain: a state of the art. *Pain* 2000;85(3):317-32. doi: 10.1016/S0304-3959(99)00242-0  
53  
54 22 CASP Critical Appraisal Skills Programme, Qualitative Studies Checklist [https://casp-](https://casp-uk.net/casp-tools-checklists/)  
55 [uk.net/casp-tools-checklists/](https://casp-uk.net/casp-tools-checklists/) accessed 06.02.24  
56  
57 23 Booth A, Hannes K, Harden A, et al. COREQ (Consolidated Criteria for Reporting Qualitative  
58 Studies). Chapter 21 in Moher D, Altman DG, Schulz KF, Simera I, Wager E (eds): Guidelines for  
59 reporting health research: a user's manual. London, UK. John Wiley & Sons 2014:214-26.  
60

- 1  
2  
3 24 Thomas J, Harden A. Cochrane Training. Thematic Synthesis – Part 1: Thematic synthesis: an  
4 overview of its use and features. 2022. <https://www.youtube.com/watch?v=JheRBpXYXC8&t=4s>.  
5 Accessed 07.02.24  
6
- 7 25 Wailling J, Marshall C, Wilkinson J. (2019). Hearing and responding to the stories of survivors  
8 of surgical mesh: Ngā kōrero a ngā mōrehu – he urupare (A report for the Ministry of Health).  
9 Wellington, New Zealand: The Diana Unwin Chair in Restorative Justice, Victoria University of  
10 Wellington.  
11
- 12 26 Brown J. A thorn in the flesh: the experience of women living with surgical mesh  
13 complications. Dissertation, Master of Chaplaincy 2019. <http://hdl.handle.net/10523/9373>.  
14 Accessed 07.02.24.  
15
- 16 27 Brown JL. The experiences of seven women living with pelvic surgical mesh complications.  
17 *Int Urogynecol J* 2020;31:823-9. doi: 10.1007/s00192-019-04155-w  
18
- 19 28 Roos AM, Thakar R, Sultan AH, et al. The impact of pelvic floor surgery on female sexual  
20 function: a mixed quantitative and qualitative study. *BJOG* 2014;121:92–101. doi: 10.1111/1471-  
21 0528.12412  
22
- 23 29 Oxlad M, Edwards G, McKinlay KA. Patients' perspective about doctor-patient  
24 communication regarding transvaginal mesh implant surgery. *Patient Educ Couns* 2022;105:3534-9.  
25 doi: 10.1016/j.pec.2022.08.021  
26
- 27 30 Dibb B, Woodgate F, Taylor Y. When things go wrong: experiences of vaginal mesh  
28 complications. *Int Urogynecol J* 2023;34:1575-81. doi: 10.1007/s00192-022-05422-z  
29
- 30 31 Izett-Kay ML, Lumb C, Cartwright R, et al. 'What research was carried out on this vaginal  
31 mesh? 'Health-related concerns in women following mesh-augmented prolapse surgery: a thematic  
32 analysis. *BJOG* 2021;128:131–9. doi: 10.1111/1471-0528.16331  
33
- 34 32 Toye F, Izett-Kay M, Barker KL, et al. The experience of women reporting damage from  
34 vaginal mesh: a reflexive thematic analysis. *eClinicalMedicine* 2023;58:101918. doi:  
35 10.1016/j.eclinm.2023.101918  
36
- 37 33 Dunn GE, Hansen BL, Egger MJ, et al. Changed women: the long-term impact of vaginal mesh  
38 complications. *Female Pelvic Med Reconstr Surg* 2014;20:131-6. doi:  
39 10.1097/SPV.0000000000000083  
40
- 41 34 Uberoi P, Lee W, Lucioni A, et al. Listening to women: a qualitative analysis of experiences  
42 after complications from mesh mid-urethral sling surgery. *Urology* 2021;148:106-12. doi:  
43 10.1016/j.urology.2020.11.006  
44
- 45 35 Huntington A, Bramwell E, Sullivan P. The loss of a life well lived: a qualitative study  
46 exploring the impact of surgical mesh implants on the lives of a group of New Zealand women.  
47 Unpublished Report. *Mesh Down Under group*. [https://meshinjuredaustralia.org.au/wp-](https://meshinjuredaustralia.org.au/wp-content/uploads/2019/09/The-Loss-of-a-Life-Well-Lived-MDU-Research-Report-June-2019.pdf)  
48 [content/uploads/2019/09/The-Loss-of-a-Life-Well-Lived-MDU-Research-Report-June-](https://meshinjuredaustralia.org.au/wp-content/uploads/2019/09/The-Loss-of-a-Life-Well-Lived-MDU-Research-Report-June-2019.pdf)  
49 [2019.pdf](https://meshinjuredaustralia.org.au/wp-content/uploads/2019/09/The-Loss-of-a-Life-Well-Lived-MDU-Research-Report-June-2019.pdf). Accessed 07.02.24  
50
- 51 36 McKinlay KA, Oxlad M. 'I have no life and neither do the ones watching me suffer': women's  
52 experiences of transvaginal mesh implant surgery. *Psychol Health* 2022;1-22. doi:  
53 10.1080/08870446.2022.2125513  
54
- 55 37 Hagger MS, Orbell S. The common sense model of illness self-regulation: a conceptual  
56 review and proposed extended model. *Health Psychol Rev* 2022;16(3):347–377. doi:  
57 10.1080/17437199.2021.1878050  
58  
59  
60

- 1  
2  
3 38 Ducey A, Donoso C, Ross S, et al. From anatomy to patient experience in pelvic floor surgery: Mindlines, evidence, responsibility, and transvaginal mesh. *Soc Sci Med* 2020;260:113151. doi: 10.1016/j.socscimed.2020.113151
- 4  
5  
6  
7 39 Lee W, Uberoi P, Berry DL, et al. The evolving story of mesh mid-urethral sling: Surgeon's insights into the patient experience and outcomes. *Female Pelvic Med Reconstr Surg* 2020;26(10 Suppl 1):S136.
- 8  
9  
10  
11 40 Leiter V, White SK. Enmeshed in controversy: Claims about the risks of vaginal mesh devices. *Health Risk Soc* 2015;17(1):64-80. doi: 10.1080/13698575.2014.1000835
- 12  
13  
14 41 Criado-Perez C. Invisible women: exposing data bias in a world designed for men. London, UK. Vintage (Chatto & Windus) 2019.
- 15  
16 42 Gatchel RJ, Peng YB, Peters ML, et al. The biopsychosocial approach to chronic pain: Scientific advances and future directions. *Psychol Bull* 2007;133(4):581-624. doi: 10.1037/0033-2909.133.4.581
- 17  
18  
19  
20 43 Ruffolo AF, Lallemand M, Delplanque S, et al. The transvaginal mesh: an overview of indications and contraindications for its use. *Expert Rev Med Devices* 2023;20(5):393-400. doi: 10.1080/17434440.2023.2199926
- 21  
22  
23  
24 44 Lewin S, Booth A, Glenton C, et al. Applying GRADE-CERQual to qualitative evidence synthesis findings: introduction to the series. *Implement Sci* 2018;13(Suppl 1):2. doi: 10.1186/s13012-017-0688-3
- 25  
26  
27  
28 45 Mangir N, Dikici BA, Chapple CR, et al. Landmarks in vaginal mesh development: polypropylene mesh for treatment of SUI and POP. *Nature Rev* 2019;16:675-89. doi: 10.1038/s41585-019-0230-2
- 29  
30  
31  
32 46 Souder CP, Anger JT, Wood LN, et al. The influence of mesh litigation on reporting in the MAUDE database. *Neurourol Urodyn* 2016;35:S57-S57.
- 33  
34  
35 47 Angelova N, Taylor L, McKee L, et al. User testing a patient information resource about potential complications of vaginally inserted synthetic mesh. *BMC Womens Health* 2021;21:35. doi: 10.1186/s12905-020-01166-4
- 36  
37  
38  
39  
40  
41  
42  
43  
44  
45  
46  
47  
48  
49  
50  
51  
52  
53  
54  
55  
56  
57  
58  
59  
60

Contributors: AW conceived the study; AW and HM designed the study; HM conducted the searches; HM and AW screened and extracted studies from the search output; HM and AW completed COREQ/CASP appraisals and agreed them; HM completed initial coding of studies; AW and HM combined codes into themes and subthemes; ML and AW consulted women with mesh about the draft thematic synthesis; AW drafted the paper, HM drafted Figure 1, Tables 1 and 2 and supplementary information, and ML and HM critically reviewed the paper and gave final approval. All meet criteria for authorship, and contributions from other colleagues have been acknowledged.

Funding: Our funding is from the Advanced Pain Discovery Platform, funded by the MRC, Versus Arthritis, ESRC, BBSRC, Medical Research Foundation, Astra Zeneca, and EliLilly: Grant Reference No. MR/W002426/1; Primary Investigator Professor Geoff Woods, University of Cambridge. The funding organisations had no role in the design and conduct of the study, collection or analysis of data, or preparation of the paper.

Competing interests: All authors have completed the ICMJE disclosure form and declare: no financial support from any industry for the submitted work; no other relationships or activities that could appear to have influenced the submitted work.

Ethical approval: Not required for main study; UCL Research Ethics Committee (ref:2182 Amendment 1) for involvement of women with pelvic mesh complications on interpretation of results.

Transparency: All authors affirm that the manuscript is an honest, accurate, and transparent account of the study being reported; that no important aspects of the study have been omitted; and that any discrepancies from the study as planned and registered have been explained.

The Corresponding Author has the right to grant on behalf of all authors and does grant on behalf of all authors, a worldwide licence to the Publishers and its licensees in perpetuity, in all forms, formats and media (whether known now or created in the future), to i) publish, reproduce, distribute, display and store the Contribution, ii) translate the Contribution into other languages, create adaptations, reprints, include within collections and create summaries, extracts and/or, abstracts of the Contribution, iii) create any other derivative work(s) based on the Contribution, iv) to exploit all subsidiary rights in the Contribution, v) the inclusion of electronic links from the Contribution to third party material where-ever it may be located; and, vi) licence any third party to do any or all of the above.



**Table 1 Characteristics of included studies**

| Author, date of publication, author details, financial interests                                                                                             | Title                                                                                                                                                 | Research focus                                                     | Recruitment                                                | Sample size                                                   | Data collection method                                             |
|--------------------------------------------------------------------------------------------------------------------------------------------------------------|-------------------------------------------------------------------------------------------------------------------------------------------------------|--------------------------------------------------------------------|------------------------------------------------------------|---------------------------------------------------------------|--------------------------------------------------------------------|
| Brown 2020 <sup>27</sup><br>F nurse with lived experience of mesh.<br>No financial interests.                                                                | The experiences of seven women living with pelvic surgical mesh complications                                                                         | Lived experience                                                   | Women attending physiotherapy                              | 7                                                             | Semi-structured interview                                          |
| Cumberlege (chair) 2020; <sup>16</sup><br>F politician and life peer; panel M physician, M communication consultant, F secretary.<br>No financial interests. | First do no harm: the report of the Independent Medicines and Medical Devices Safety Review                                                           | Adverse experiences, information useful for making recommendations | Mesh patient groups, affected individuals including carers | Unclear: >100                                                 | Independent inquiry: patient engagement events, feedback on drafts |
|                                                                                                                                                              | Annex J: Personal testimonies                                                                                                                         |                                                                    |                                                            | Unclear: >10                                                  | Written                                                            |
|                                                                                                                                                              | Annex K: Oral hearing transcripts                                                                                                                     |                                                                    |                                                            | 5 women with mesh, 1 carer, 12 mesh group reps; 10 clinicians | Oral accounts in hearings; transcribed, plus one letter            |
| Dibb et al. 2023, <sup>30</sup> all 3 F health researchers.<br>No financial interests.                                                                       | When things go wrong: experiences of vaginal mesh complications                                                                                       | Complications of mesh and their impact                             | Mesh support group on social media                         | 18                                                            | Semi-structured interview                                          |
| Dunn et al. 2014, <sup>33</sup> all 7 F doctors or nurses mainly in urogynaecology.<br>No financial interests.                                               | Changed women: the long-term impact of vaginal mesh complications                                                                                     | Women’s experience of mesh complications after specialist care     | Urogynaecology clinic for mesh complications               | 84                                                            | Structured telephone interview                                     |
| Huntington et al. 2019, <sup>35</sup> 2 F health researchers, 1 F mesh group advocate.<br>No declaration of interest.                                        | The loss of a life well lived: a qualitative study exploring the impact of surgical mesh implants on the lives of a group of New Zealand women        | Impact of mesh complications                                       | Mesh support group through health advocate                 | 23                                                            | E-mailed account                                                   |
| Izett-Kay et al. 2020, <sup>31</sup> 5 M surgeons, 1 F consultant, 1 F medical researcher.<br>3 disclosed financial interests.                               | ‘What research was carried out on this vaginal mesh?’ Health-related concerns in women following mesh-augmented prolapse surgery: a thematic analysis | Health problems after mesh insertion                               | Patients of 5 surgeons                                     | 752                                                           | Free text responses on written/online questionnaire                |

|                                                                                                                  |                                                                                                                       |                                                                            |                                                                                                                            |     |                                                     |
|------------------------------------------------------------------------------------------------------------------|-----------------------------------------------------------------------------------------------------------------------|----------------------------------------------------------------------------|----------------------------------------------------------------------------------------------------------------------------|-----|-----------------------------------------------------|
| McKinlay, Oxlad 2022, <sup>36</sup> 2 F health researchers.<br>No financial interests                            | 'I have no life and neither do the ones watching me suffer': women's experiences of transvaginal mesh implant surgery | Impact of mesh, taking biopsychosocial perspective                         | Written submissions from national inquiry into mesh                                                                        | 153 | Free text from submissions                          |
| Toye et al. 2023, <sup>32</sup> 3 health researchers, 1 M surgeon.<br>No financial interests.                    | The experience of women reporting damage from vaginal mesh: a reflexive thematic analysis                             | Explore and understand the experience of living with complications of mesh | Women being treated for urogynaecological conditions through healthcare, advocacy groups, advertisement, snowball sampling | 15  | Semi-structured interviews, telephone or video call |
| Uberoi et al. 2021, <sup>34</sup> 1 M & 2 F surgeons, 1 M urologist, 2 F researchers.<br>No financial interests. | Listening to women: a qualitative analysis of experiences after complications from mesh mid-urethral sling surgery    | Understand women's experiences after mesh revision                         | Patients of 3 surgeons                                                                                                     | 19  | Semi-structured interviews & focus groups           |

Key: F female, M male

## Table 2 Thematic analysis

The main themes are in **bold and underlined**. Subthemes use as heading a *quotation* from a mesh-affected woman in one of the studies

Subthemes show constituent codes, the most frequently occurring in **bold**, and the least frequent in *grey*. Positive comments that belong in the code are prefixed and suffixed by a '+’.

### **Broken body, broken mind**

“my life is never going to be the same”

- **this is my life now, 'new normal'**
- **permanent problem, ruined life, reduced quality of life**
- impact on identity, changed as a person, perspective changed, life on hold, lack of fulfilment
- **chronic pain**, descriptions of extreme pain, lower back pain
- not able to function, lost trust in body, feeling broken
- grief, loss, feeling robbed
- bladder problems, pain, dysfunction, discharge, repeated infections, abnormal bleeding, bowel problems, incontinence; practical issues associated with bleeding, discharge, incontinence
- comorbidities, cascading health issues, fatigue, tiredness, consequences of medication, sleep disruption, weight gain
- shame, embarrassment, loss of confidence, impact on self-esteem, hopelessness

“I can’t achieve very much”

- **being or doing less than before surgery**
- activity and physical limitations, loss of mobility, daily difficulties, limitations on daily life, worsening after activity, not being able to sit or stand, not being able to do housework, restriction on travel
- disability, feeling like a burden, loss of independence

“It has left me feeling lost, extremely anxious”

- **anxiety, mental health affected, distress, suicidal feelings**, depression, feelings of frustration and anger, emotional volatility, 'emotional wreck', guilt, self-blame, unhealthy coping mechanisms e.g. alcohol
- having psychological treatment, counselling, therapy

“You can’t have that [sexual] relationship with someone screaming in pain”

- loss of intimacy, impact on sex affecting relationship, penetrative sex as impossible, dyspareunia
- generic sexual problems, avoidance of sex
- partner feels mesh during sex [validating]

### **Linked to both broken body and distrust of doctors**

“I am frightened if I take it out; I am frightened if I don’t”

- **fear of future problems and future surgery**, uncertain future
- multiple operations or hospitalisation to fix subsequent problems, wishing for mesh removal, remaining mesh, mesh as alien, foreign in the body, mesh erosion

### **Distrust of doctors and medical industry**

“She suggested that it was such an easy fix”

- **feeling misinformed about some or all risks, not knowing, being lied to**, 'quick fix', benefits overstated, lack of informed consent and informed choice, feeling 'sold' on mesh, regret surgery

- lacked or wanted more discussion of alternatives to surgery
  - preoperative expectations of improvement after surgery, recovery taking longer/being harder than expected
  - feeling dehumanised, 'human guinea pigs'
- "you're the only person I've seen who is complaining and thinking you have problems"
- **dismissal of patient concerns, 'it's all in your head', 'there is nothing wrong with you'**
  - doctors not taking responsibility for the problem, doctors not giving attention needed, lack of empathy, insensitive medical professionals
  - doctors blaming women
- "I trusted fully all I was told" / "I was in a very vulnerable position and felt unable to say no."
- **trust lost**
  - **should not have put trust in doctor, importance of patient - provider relationship, power dynamic in patient-doctor relationship**
- "All that I ask is honesty"
- health system as understandably fallible - no time, doctors as people - etc; wanting more transparency, wanting acknowledgement of what has happened
  - adverse event need to be logged, problems with mesh described as 'unusual' by doctors, medical professionals needing more education on mesh
  - looking for information. +positive interactions with medical professionals+
- "I have beaten cancer, but mesh [has] beaten me"
- **victims of mesh, medical companies**
  - trauma, medical trauma, PTSD, mesh should be banned
  - danger - potentially fatal
  - litigation, financial compensation desired, battle to obtain financial compensation

### **Broken life**

"My children needed their mother back"

- **relationship with grandchildren and children affected**, impact on family, relationship with partner affected, dynamic changed
- +family is reason for living, my family and friends keep me going; support from partner+
- unsupported by partner, breakdown of relationship with partner

"people get bored with it, and they're not interested, and you sort of get dropped"

- **isolation, loneliness**
- **not being listened to, not being believed**, suffering in silence, people don't want to hear about it,
- social relationships and friendships affected, social life affected, preventing new potential relationships

- "I am unable to work ... I miss being able to contribute".

- impact on career, loss of job, having to take time off work, financial burden of being able to work
- financial burden of treatment, medication, supplies

### **Keeping going - 'a changed future'**

- wanting to help others, concern for others with mesh complications, being able to relate to others with the same condition
- +successful mesh experience+, how women judge their surgery, what is judged as success
- +positives that have come from vaginal mesh; positive hopes for the future+
- vaginal mesh community being upsetting

**Table 3 Coverage of themes and subthemes by studies**

|                                                                                      | Brown<br>27 | Cumberlege<br>16 | Dibb<br>30 | Dunn<br>33 | Huntington<br>35 | Izett-<br>Kay <sup>31</sup> | McKinlay<br>36 | Toye<br>32 | Uberoi<br>34 |
|--------------------------------------------------------------------------------------|-------------|------------------|------------|------------|------------------|-----------------------------|----------------|------------|--------------|
| <b>Broken body, broken mind</b>                                                      |             |                  |            |            |                  |                             |                |            |              |
| "my life is never going to be the same"                                              | y           | y                | y          | y          | y                | y                           | y              | y          | y            |
| "I can't achieve very much"                                                          | y           | y                | y          | y          | y                | y (+)                       | y              | y          | y            |
| "It has left me feeling lost, extremely anxious"                                     | -           | y                | y          | y          | y                | y                           | y              | y          | y            |
| "You can't have that [sexual] relationship with someone screaming in pain"           | y           | y                | y          | y          | y                | -                           | y              | y          | y            |
| <b>Linked to both broken body and distrust of doctors</b>                            |             |                  |            |            |                  |                             |                |            |              |
| "I am frightened if I take it out; I am frightened if I don't"                       | y           | y                | y          | y          | y                | y                           | y              | y          | y            |
| <b>Distrust of doctors and medical industry</b>                                      |             |                  |            |            |                  |                             |                |            |              |
| "She suggested that it was such an easy fix"                                         | y           | y                | y          | y          | y                | y                           | y              | y          | y            |
| "you're the only person I've seen who is complaining and thinking you have problems" | y           | y                | y          | y          | y                | y                           | y              | y          | y            |
| "I trusted fully all I was told"                                                     | y           | y                | y          | y          | y                | -                           | -              | y          | y            |

|                                                                                                          |                                                                                     |   |       |   |   |   |       |   |       |       |
|----------------------------------------------------------------------------------------------------------|-------------------------------------------------------------------------------------|---|-------|---|---|---|-------|---|-------|-------|
| 1<br>2<br>3<br>4<br>5<br>6<br>7<br>8<br>9<br>10<br>11<br>12                                              | “All that I ask is honesty”                                                         | y | y (+) | - | y | y | y (+) | - | y (+) | y (+) |
| 13                                                                                                       | <b>Broken life</b>                                                                  |   |       |   |   |   |       |   |       |       |
| 14<br>15<br>16<br>17<br>18<br>19<br>20<br>21<br>22<br>23<br>24<br>25<br>26<br>27<br>28<br>29<br>30<br>31 | “I have beaten cancer, but mesh [has] beaten me”                                    | y | y     | y | y | y | y     | y | y     | y     |
| 32<br>33<br>34<br>35<br>36<br>37<br>38                                                                   | “My children needed their mother back”                                              | y | y     | y | - | y | -     | y | y     | y     |
| 39<br>40<br>41<br>42<br>43<br>44                                                                         | “people get bored with it, and they’re not interested, and you sort of get dropped” | y | -     | y | y | y | -     | y | y     | y     |
| 45<br>46<br>47<br>48<br>49<br>50<br>51<br>52<br>53<br>54<br>55<br>56<br>57<br>58<br>59<br>60             | “I am unable to work ... I miss being able to contribute ”                          | y | y     | - | y | y | -     | y | y     | -     |
|                                                                                                          | <b>Keeping going - ‘a changed future’</b>                                           | - | y     | y | y | y | y     | - | y     | y (+) |

+ = positive aspects e.g. positive interactions with medical professionals

Figure 1

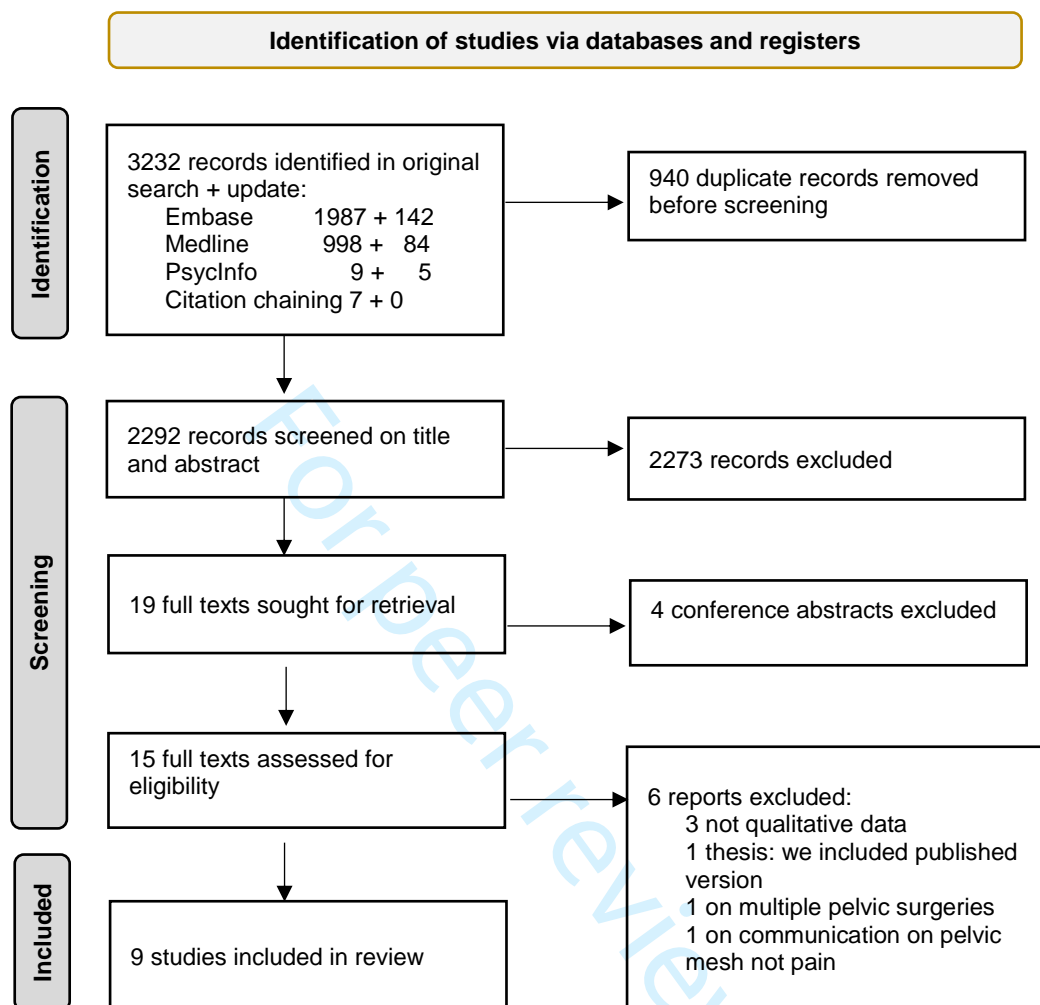

### Supplementary data

The search terms used for each database were:

1. quality of life.ab,ti.
2. experience.ab,ti.
3. survey.ab,ti.
4. qualitative.ab,ti.
5. 1 or 2 or 3 or 4
6. Pelvic organ prolapse.mp. or Pelvic Organ Prolapse/
7. Surgical mesh.mp. or Surgical Mesh/
8. 6 and 7
9. Vaginal mesh.mp
10. Transvaginal mesh.mp
11. TVT.mp or transvaginal tape.mp
12. 8 or 9 or 10 or 11
13. 5 and 12



## ENTREQ checklist

| Item                       | Guide and description                                                                                                                                                                                                                                                                                                                                                                                           | Reported on page #                               |
|----------------------------|-----------------------------------------------------------------------------------------------------------------------------------------------------------------------------------------------------------------------------------------------------------------------------------------------------------------------------------------------------------------------------------------------------------------|--------------------------------------------------|
| Aim                        | State the research question the synthesis addresses                                                                                                                                                                                                                                                                                                                                                             | Abstract p2, Introduction p3                     |
| Synthesis methodology      | Identify the synthesis methodology or theoretical framework which underpins the synthesis, and describe the rationale for choice of methodology (e.g. meta-ethnography, thematic synthesis, critical interpretive synthesis, grounded theory synthesis, realist synthesis, meta-aggregation, meta-study, framework synthesis).                                                                                  | Data synthesis p4                                |
| Approach to searching      | Indicate whether the search was pre-planned (comprehensive search strategies to seek all available studies) or iterative (to seek all available concepts until theoretical saturation is achieved).                                                                                                                                                                                                             | Search strategy p3                               |
| Inclusion criteria         | Specify the inclusion/exclusion criteria (e.g. in terms of population, language, year limits, type of publication, study type).                                                                                                                                                                                                                                                                                 | Inclusion and exclusion criteria, p3             |
| Data sources               | Describe the information sources used (e.g. electronic databases (MEDLINE, EMBASE, CINAHL, psychINFO, Econlit), grey literature databases (digital thesis, policy reports), relevant organisational websites, experts, information specialists, generic web searches (Google Scholar), hand searching, reference lists) and when the searches were conducted; provide the rationale for using the data sources. | Search strategy, p3                              |
| Electronic search strategy | Describe the literature search (e.g. provide electronic search strategies with population terms, clinical or health topic terms, experiential or social phenomena related terms, filters for qualitative research and search limits).                                                                                                                                                                           | Supplementary data                               |
| Study screening methods    | Describe the process of study screening and sifting (e.g. title, abstract and full text review, number of independent reviewers who screened studies)                                                                                                                                                                                                                                                           | Study selection p4                               |
| Study characteristics      | Present the characteristics of the included studies (e.g. year of publication, country, population, number of participants, data collection, methodology, analysis, research questions).                                                                                                                                                                                                                        | Table 1, p14-15                                  |
| Study selection results    | Identify the number of studies screened and provide reasons for study exclusion (e.g. for comprehensive searching, provide numbers of studies screened and reasons for exclusion indicated in a figure/flowchart; for iterative searching describe reasons for study exclusion and inclusion based on modifications to the research question and/or contribution to theory development).                        | Figure 1, and Results p4-5                       |
| Rationale for appraisal    | Describe the rationale and approach used to appraise the included studies or selected findings (e.g. assessment of conduct (validity and robustness), assessment of reporting (transparency), assessment of content and utility of the findings).                                                                                                                                                               | Evaluation of studies, p4; CERQual categories p8 |
| Appraisal items            | State the tools, frameworks and criteria used to appraise the studies or selected findings (e.g. Existing tools: CASP, QARI, COREQ, Mays and Pope [25]; reviewer developed tools; describe the domains assessed: research team, study design, data analysis and interpretations, reporting).                                                                                                                    | Combined CASP and COREQ, Table 2 and p5-6        |

|    |                      |                                                                                                                                                                                                                                                      |                                                                         |
|----|----------------------|------------------------------------------------------------------------------------------------------------------------------------------------------------------------------------------------------------------------------------------------------|-------------------------------------------------------------------------|
| 1  | Appraisal process    | Indicate whether the appraisal was conducted independently by more than one reviewer and if consensus was required.                                                                                                                                  | Evaluation of studies p4                                                |
| 2  | Appraisal results    | Present results of the quality assessment and indicate which articles, if any, were weighted/excluded based on the assessment and give the rationale.                                                                                                | Aims & methods of included studies pp5-6 & supplementary data           |
| 3  | Data extraction      | Indicate which sections of the primary studies were analysed and how were the data extracted from the primary studies? (e.g. all text under the headings "results /conclusions" were extracted electronically and entered into a computer software). | Data synthesis p4                                                       |
| 4  | Software             | State the computer software used, if any.                                                                                                                                                                                                            | Data synthesis, p4                                                      |
| 5  | Number of reviewers  | Identify who was involved in coding and analysis                                                                                                                                                                                                     | Data synthesis, p4; Patient and public involvement, p4                  |
| 6  | Coding               | Describe the process for coding of data (e.g. line by line coding to search for concepts).                                                                                                                                                           | Data synthesis, p4                                                      |
| 7  | Study comparison     | Describe how were comparisons made within and across studies (e.g. subsequent studies were coded into pre-existing concepts, and new concepts were created when deemed necessary).                                                                   | Data synthesis p4                                                       |
| 8  | Derivation of themes | Explain whether the process of deriving the themes or constructs was inductive or deductive.                                                                                                                                                         | Data synthesis p4                                                       |
| 9  | Quotations           | Provide quotations from the primary studies to illustrate themes/constructs, and identify whether the quotations were participant quotations or the author's interpretation                                                                          | Table 3 uses direct quotations from primary studies as sub-theme titles |
| 10 | Synthesis output     | Present rich, compelling and useful results that go beyond a summary of the primary studies (e.g. new interpretation, models of evidence, conceptual models, analytical framework, development of a new theory or construct).                        | Discussion pp7-8                                                        |

# BMJ Open

## **Pain and other complications of pelvic mesh: a systematic review of qualitative studies and thematic synthesis of women's accounts**

|                                 |                                                                                                                                                         |
|---------------------------------|---------------------------------------------------------------------------------------------------------------------------------------------------------|
| Journal:                        | <i>BMJ Open</i>                                                                                                                                         |
| Manuscript ID                   | bmjopen-2024-085879.R1                                                                                                                                  |
| Article Type:                   | Original research                                                                                                                                       |
| Date Submitted by the Author:   | 14-May-2024                                                                                                                                             |
| Complete List of Authors:       | Williams, Amanda; UCL, Psychology and Language Sciences<br>Lodato, Mary; independent researcher<br>McGrigor, Honor; UCL, Psychology & Language Sciences |
| <b>Primary Subject Heading</b>: | Obstetrics and gynaecology                                                                                                                              |
| Secondary Subject Heading:      | Urology, Reproductive medicine                                                                                                                          |
| Keywords:                       | QUALITATIVE RESEARCH, Urogynaecology < UROLOGY, Urinary incontinences < UROLOGY, Adverse events < THERAPEUTICS, Chronic Pain                            |
|                                 |                                                                                                                                                         |

SCHOLARONE™  
Manuscripts



I, the Submitting Author has the right to grant and does grant on behalf of all authors of the Work (as defined in the below author licence), an exclusive licence and/or a non-exclusive licence for contributions from authors who are: i) UK Crown employees; ii) where BMJ has agreed a CC-BY licence shall apply, and/or iii) in accordance with the terms applicable for US Federal Government officers or employees acting as part of their official duties; on a worldwide, perpetual, irrevocable, royalty-free basis to BMJ Publishing Group Ltd ("BMJ") its licensees and where the relevant Journal is co-owned by BMJ to the co-owners of the Journal, to publish the Work in this journal and any other BMJ products and to exploit all rights, as set out in our [licence](#).

The Submitting Author accepts and understands that any supply made under these terms is made by BMJ to the Submitting Author unless you are acting as an employee on behalf of your employer or a postgraduate student of an affiliated institution which is paying any applicable article publishing charge ("APC") for Open Access articles. Where the Submitting Author wishes to make the Work available on an Open Access basis (and intends to pay the relevant APC), the terms of reuse of such Open Access shall be governed by a Creative Commons licence – details of these licences and which [Creative Commons](#) licence will apply to this Work are set out in our licence referred to above.

Other than as permitted in any relevant BMJ Author's Self Archiving Policies, I confirm this Work has not been accepted for publication elsewhere, is not being considered for publication elsewhere and does not duplicate material already published. I confirm all authors consent to publication of this Work and authorise the granting of this licence.

1  
2  
3 **Pain and other complications of pelvic mesh: a systematic review of qualitative studies and**  
4 **thematic synthesis of women's accounts**  
5

6 Amanda C de C Williams (0000-0003-3761-8704), Mary Lodato (0009-0005-7476-6679), Honor  
7 McGrigor (0009-0005-4701-9133)  
8

9 Amanda Williams, Research Department of Clinical Educational & Health Psychology, University  
10 College London, London WC1E 6BT, UK

11 Mary Lodato, independent researcher, Kettering, Northants, UK

12 Honor McGrigor, Research Department of Clinical Educational & Health Psychology, University  
13 College London, London, UK  
14  
15

16 Correspondence to:

17 Dr A C de C Williams

18 amanda.williams@ucl.ac.uk  
19  
20  
21  
22  
23  
24  
25  
26  
27  
28  
29  
30  
31  
32  
33  
34  
35  
36  
37  
38  
39  
40  
41  
42  
43  
44  
45  
46  
47  
48  
49  
50  
51  
52  
53  
54  
55  
56  
57  
58  
59  
60

## Abstract

**Objectives:** Synthesis of the experience of women with pain from pelvic or vaginal mesh or its removal, to identify pain-related problems, and to formulate psychological aspects of pain.

**Design:** Systematic review and thematic analysis of qualitative studies of pain from pelvic or vaginal mesh, or mesh removal, in women over 18 years, using individual interviews, focus groups, free text, or written or oral contributions to formal enquiries.

**Data sources:** Medline, Embase, and PsycInfo, from inception to April 26, 2023.

**Eligibility criteria:** Qualitative studies of pain and other symptoms from pelvic or vaginal mesh or its removal; adults; no language restriction.

**Data extraction and synthesis:** Line-by-line coding of participant quotations and study author statements by one author to provide codes that were applied to half the studies by another author and differences resolved by discussion. Codes were grouped into sub-themes and themes by both authors, then scrutinised and discussed by a focus group of mesh-injured women for omissions, emphasis, and coherence. Studies were appraised using an amalgamation of the CASP and COREQ tools.

**Results:** 2292 search results produced nine eligible studies, with seven to 752 participants, a total of around 2000. Four recruited patients, four totally or partially from mesh advocacy groups, and two were national enquiries (UK and Australia). Four major themes were: Broken body, broken mind; Distrust of doctors and medical industry; Broken life; and Keeping going – a changed future. Psychological content mainly concerned loss of trust in medical care, leaving women unsupported in facing an uncertain future. Mesh-injured women strongly endorsed the findings.

**Conclusions:** Pain and other problems associated with pelvic mesh are profound and far-reaching for women affected. Worse, they feel subject to continued gaslighting, including denial of their mesh-related problems and dismissal of their concerns about continued mesh insertion.

**Study registration:** PROSPERO, CRD42022330527.

### Strengths and limitations of this study

- Involvement of women with mesh complications in reviewing and discussing findings contributes to confidence in their scope and content.
- Contributing women with mesh complications were all from the UK, but ideally would have been from a wider range of backgrounds.
- Despite no language restriction, studies reviewed had low ethnic diversity and were all from high income English-speaking countries, limiting applicability of review findings.

## INTRODUCTION

The use of synthetic mesh to repair pelvic organ prolapse (POP) or for stress urinary incontinence (SUI), both relatively common conditions in women, proliferated under weak regulation and without clinical trials, drawing instead on successful use of mesh in hernia repair.[1] An early review[2] listed complications including erosion, fistula, infection, chronic pain, and dyspareunia, and cited the 2008 US Food & Drug Administration recommendations to “be vigilant for potential adverse events” and to inform patients of possible serious complications. Two small systematic reviews[3,4] on mesh surgery for POP and SUI found adverse effects were poorly recorded and follow-up inadequate, so both recommended a conservative approach. Guidelines published between 2015 and 2017 reported weak stakeholder (particularly patient) involvement, and inadequate declaration of competing interests.[5]

Pelvic mesh insertion was halted in the UK in 2018 and US in 2019. Reports of serious problems, particularly pain, reached public attention (e.g. [6,7]), generating mass legal action in the US. Complication rates from UK hospital data were estimated as 9.8% - 12.8% over 5 years of follow-up.[8] Several studies of women who had undergone mesh insertion[9-12] suggested that they were poorly informed about adverse effects or alternative treatments, with internet information of variable quality.[13] Women who developed problems with mesh often had considerable difficulty convincing doctors of their symptoms and that mesh was the cause, or obtaining adequate care.[14,15] Formal enquiries in the UK (The Cumberlege Report),[16] Scotland[17] and Australia[18] recorded widespread and severe distress and substantial shortcomings in care. A systematic review of mesh complications[19] found only one prospective study, and very varied outcomes of pain and other symptoms, and little on quality of life. A qualitative systematic review[14] described how discounting of women’s experience compounded the psychological harm from mesh.

More recent studies and rich material from national enquiries provide data for a larger and more critical meta-synthesis of qualitative studies. A particular focus here was the relationship of pain to mesh-associated disabilities: the standard model of pain, developed in musculoskeletal patient populations, identifies fears of increased pain or damage as the basis of extensive activity avoidance that constitutes disability,[20,21] but the extent to which this applies to visceral pain is uncertain.

## METHODS

This systematic review was registered with the International Prospective Register of Systematic Reviews (PROSPERO CRD42022330527). In preparation for the review, the researchers discussed mesh related pelvic pain and key literature with clinicians involved in treatment, and consulted an academic librarian about search terms and databases.

### *Search strategy*

On 24<sup>th</sup> October 2022, a comprehensive literature search of Medline, Embase, and PsycInfo was conducted, and updated by repeating it on 26<sup>th</sup> April 2023 (see supplementary data for search terms). Following each search, citation chaining was used.

### *Inclusion and exclusion criteria*

The inclusion criteria were: (1) qualitative research on pain from pelvic or vaginal mesh, or pain after mesh removal; (2) in adults (18 and over); (3) in peer-reviewed journals or publicly available PhD theses. No limitations were placed on language or date of publication.

### *Study selection*

1  
2  
3 Records from the searches and citation chaining were exported to Endnote X9.3.3. and deduplicated  
4 using automated then manual methods. The remaining records were screened (by HM) on title and  
5 abstract, and ineligible records removed; the lead researcher (AW) checked a 5% random sample of  
6 these rejected records. Possible records were retrieved as full texts, read by both researchers  
7 independently to decide on inclusion or reasons for exclusion.  
8  
9

### 10 ***Evaluation of studies***

11 The characteristics of studies were appraised using an amalgamation of the CASP[22] and  
12 COREQ[23] quality assessment tools (see supplementary information) from which essentially similar  
13 items had been removed. Both researchers rated the included studies independently and discussed  
14 their ratings to achieve consensus.  
15  
16

### 17 ***Data synthesis***

18  
19 The data were treated according to Thomas and Harden's thematic synthesis method.[24] Using  
20 NVivo 12 1.6.1, one researcher (HM) read all the texts, generated initial codes using inductive  
21 methods, then coded Results (including direct quotations) and Discussions of included studies, line  
22 by line. These codes were used by the other researcher (AW) on 5 of the 9 studies. This enabled  
23 collapse of many codes to produce a more compact set. Both researchers generated sub-themes and  
24 themes from these codes.  
25  
26

### 27 ***Positionality and reflexivity***

28  
29 Given the subjective bias that affects data analysis, we provide the following information for readers  
30 to consider. AW is an academic and clinical psychologist with over 35 years' experience of clinical  
31 and research work in chronic pain, including chronic pelvic pain. She questions the fit of the fear and  
32 avoidance model in research on or clinical formulation of visceral pains. HM is a research psychology  
33 assistant, with experience in qualitative methods but not in pain. Both researchers aimed for  
34 reflexive processing of data, considering at multiple points whether and how their beliefs and  
35 concerns might influence their decisions. Neither has personal experience of chronic pelvic pain or  
36 mesh.  
37  
38

### 39 ***Patient and public involvement***

40  
41 Following analysis of themes and subthemes, the views of women with mesh complications were  
42 sought. This part of the review had approval from the UCL Research Ethics Committee (ref:2182  
43 Amendment 1). An advertisement was circulated via a member of the project's patient and charity  
44 advisory board (PCAB) to an author who is a leading member of an advocacy group that campaigns  
45 for better services and care for women with mesh complications; these collaborators also  
46 distributed information and collected consent from women who volunteered to take part.  
47 Participating women were provided with the full thematic analysis results with 2 days to read them  
48 before taking part in an online meeting, hosted by the PCAB member for pelvic mesh, at which  
49 results were discussed. Notes were taken by the first author of the paper, with a full verbatim  
50 transcription of a recording of the meeting by the PCAB member. Women were recompensed for  
51 their contributions.  
52  
53  
54  
55

## 56 **RESULTS**

57  
58 The 3232 records from the searches and citation chaining were reduced to 2292 by automatic  
59 deduplication (653 records) then manual removal (287 records). Screening of these titles and  
60



1  
2  
3 abstracts removed 2273 ineligible records; there were no disagreements on the sample of rejected  
4 records. The remaining records were discussed, resulting in full text retrieval of 19 potentially  
5 eligible qualitative studies and a further rejection of 4 conference abstracts. Of the 15 remaining, 9  
6 were included (see Figure 1, PRISMA diagram). The excluded studies were two government  
7 reports[17,25] and the transcript of a television documentary[6] that were not designed or reported  
8 in the form of qualitative data; one master's thesis[26] for which we included the published  
9 paper;[27] one study of multiple pelvic surgeries among which accounts of mesh were not  
10 distinguishable;[28] and one use of written evidence to a government enquiry to study women's  
11 accounts of communication about mesh, not addressing pain directly.[29]

### 12 13 14 15 ***Characteristics of studies and participants***

16 The included studies are described in Table 1. Four studies were conducted in the UK,[16,30,31,32]  
17 two in the United States,[33,34] two in New Zealand,[27,35] and one in Australia.[36] Participant  
18 numbers varied from 7 to 752, with a total across the 9 studies approaching (and possibly exceeding)  
19 two thousand. Four studies recruited from patient populations exclusively[27,31,33,34] and one  
20 partially;[32] four from advocacy groups for affected women, two exclusively[30,35] and two  
21 partially;[16,32] and two drew on material from national enquiries.[16,36] Where non-patient  
22 participants such as carers and clinicians also provided material for the report,[16,36] we used only  
23 submissions from affected women or representatives of mesh advocacy groups. Five studies used  
24 semi-structured[27,30,32,34] or structured[33] interviews; two drew from free text that  
25 supplemented questionnaire responses[31] or national inquiry;[36] one used free text e-mailed  
26 responses;[35] and one used transcribed oral responses from inquiry hearings and written responses  
27 to drafts of the report.[16]

28  
29  
30  
31  
32 Seven studies provided information on age, five[27,30,31,33,34] with a mean age in the fifties, and  
33 range from 20 into the eighties; the other two[32,35] provided ranges from the thirties into the  
34 seventies. Only three provided information on ethnicity, all majority or entirely white (European,  
35 non-Hispanic),[27,32,34] but it is likely that the other studies were similar in this respect. Four  
36 studies recruited from clinical populations[27,31,33,34] and one partially so;[32] two through social  
37 media support groups;<sup>30,35</sup> and two issued open invitations to contribute to national inquiries.[16,36]  
38 As far as could be ascertained, two studies recruited women with mesh still in place,[31,35] and the  
39 remainder recruited a mix of women with mesh in place, mesh partially removed, mesh fully  
40 removed, or having had unspecified revision surgery.[34]

### 41 42 43 ***Aims and methods of included studies***

44 Information collected using the combined COREQ/CASP form is summarized here (see  
45 supplementary information for detail). Six studies aimed to describe the experience of women with  
46 mesh complications, five[27,30,32,34,35] on the basis that it had been inadequately addressed in  
47 the literature, and one to follow up "optimized" specialist treatment of complications.[33] The UK  
48 inquiry[16] also aimed to recruit women with mesh-related complications. The remaining two  
49 papers aimed rather to capture varied experiences from women after mesh surgery: one using  
50 written inquiry data to explore experience "through a biopsychosocial lens",[36] the other to explore  
51 "health-related issues" in a more "balanced" way than those that focused on mesh  
52 complications.[31] It should be noted that the conflicts of interest for this latter study disclose that  
53 three of the eight authors had associations with mesh producers.

54  
55  
56  
57 Two studies[34,36] combined deductive and inductive approaches; four were  
58 inductive,[27,31,32,35] one implied an inductive approach but some themes rather closely  
59 resembled question topics,[30] one simply described "low level inference" in its analysis,[33] and the  
60

1  
2  
3 inquiry[16] took a transparent approach to reporting but did no formal qualitative analysis. Two  
4 studies[27,32] and one inquiry[16] discussed and revised their findings with the help of participants.  
5

6 Some methodological details are of interest. Of those studies that interviewed participants, five used  
7 female interviewers[27,30,32,34,35] and another probably did so but was unclear;[33] one  
8 inquiry[16] had a female chair with two male panel members and a female secretary. One study in  
9 which the researcher herself had experience of mesh surgery disclosed this to participants;[27] her  
10 paper discusses reflexivity and bias at some length. In another study,[35] one of the researchers was  
11 a health advocate who belonged to the online mesh group from which participants were recruited,  
12 but did not explore the implications of this for data or analysis. Where participants were patients  
13 treated by authors,[31,33] possibly[34], there is a lack of transparency about potential effects on  
14 recruitment, data collection and data analysis. The inquiry[16] carried out in person by a panel of  
15 experts in healthcare and in public enquiry processes describes its efforts to ensure transparency  
16 and openness, and its independence from governmental or industry influence.  
17  
18  
19

### 20 ***Thematic synthesis***

21  
22 Initial coding of content of results and discussions of all studies, drawing both on directly reported  
23 participant comments and on researcher commentary, provided 101 codes. These were collapsed  
24 and grouped by the researchers collaboratively. Subthemes were named as far as possible using  
25 quotations. The final themes and subthemes, with content, are shown in Table 2, and the studies  
26 contributing in Table 3.  
27

28  
29 There was a strong sense of double betrayal in women's accounts: feeling misled about the likely  
30 success and possible harms of the original mesh insertion surgery, and not offered alternative  
31 nonsurgical interventions; then not being believed or treated with adequate care when they  
32 reported problems post-surgically. The main themes, **broken body**, **broken mind**, and **broken life**  
33 reflected in some detail the extent and severity of adverse effects from the mesh. Chronic pain was  
34 prominent, as was incontinence and other bladder, bowel, and wider health problems. These were  
35 interwoven with frustration at the limitations imposed by pain and incontinence, and a powerful  
36 sense of loss of family and social relationships. Closely related to both of these was the sense of  
37 **distrust of doctors and the medical industry** engendered by the original decision about mesh  
38 insertion and by the uncaring response to symptoms and problems that followed. Some women felt  
39 deliberately misled by doctors, mostly surgeons, but many contextualised their experience in lack of  
40 knowledge and information among the medical profession, and in their fallibility. Despite a few  
41 positive comments about interactions with doctors, the avoidability of the disastrous experience left  
42 many women bitter about having agreed to mesh insertion.  
43  
44  
45

46 A fourth and somewhat separate theme concerned adjustment to the situation, **keeping going – a**  
47 **changed future**. This contained ways that women had made meaning from their experience, such as  
48 activism on behalf of and advocacy for women with mesh complications. Some of the comments  
49 about positive experience were apparently spontaneous, but others were elicited by leading  
50 questions (e.g. [30]).  
51

### 52 ***Review by women with experience of mesh***

53  
54 Seven women with complications of mesh took part in the online meeting, plus another who  
55 facilitated the meeting arrangements and transcribed the meeting content. Some of the women had  
56 undergone mesh removal and others had not; for most, symptoms persisted or had worsened. Their  
57 overall impression was that the themes were familiar to them and described their experiences; no  
58 major areas were raised that were missing, and they did not think that the negativity of the themes  
59  
60

1  
2  
3 was unrepresentative. The women endorsed in particular anger about the original surgery, about  
4 treatment, and about subsequently about not being believed when they presented with  
5 complications, and still not being taken seriously when they sought medical help, even unrelated to  
6 mesh. This they associated with a general dismissal of women's health problems, and the  
7 defensiveness of medicine when the possibility of iatrogenic harm was raised. All these contributed  
8 to a loss of trust and confidence in the institution of medicine. There was some concern that the  
9 themes did not adequately articulate the moral wrong of having been "mutilated by the medical  
10 industry".  
11  
12

13  
14 Further, they were concerned about lack of accountability for money spent on the recommendations  
15 of the UK Cumberlege Inquiry[16] that had been accepted by the government. They were sceptical  
16 about the adequacy of staff training in the nine specialist centres now responsible for the care of  
17 women with mesh complications, and about surgeons removing mesh who had previously been  
18 committed to implanting it. Women had hoped for the establishment of holistic and integrated care  
19 of the sort offered in some cancer services, but experienced rather a fragmentary service, little  
20 follow-up after removal. They were aware of continued pressure from some surgeons to lift the  
21 current ban on pelvic mesh. Alongside these deeply distressing experiences, women also gave credit  
22 to the GPs and surgeons they had encountered who were concerned and willing to listen and learn.  
23 Several women had pursued medicolegal cases, but some necessary medical examinations had not  
24 been performed by surgeons who were expert in mesh-related problems. Other women had felt that  
25 internal examinations and psychiatric interviews were requested in order to discourage their  
26 litigation.  
27  
28

29  
30 Women were curious about, and some were critical of, research methodologies; they emphasised  
31 how important it was to know what questions were asked when analyzing the answers that provided  
32 data for qualitative studies: that they might have been designed to elicit positive responses about  
33 mesh. They also raised the issue of vested interests of some clinician-researchers who benefited  
34 from ongoing relationships with mesh companies, and other hidden agendas (such as lifting the ban  
35 on pelvic mesh) informing research design and findings.  
36  
37  
38  
39

## 40 DISCUSSION

41  
42 Three of the four themes were overwhelmingly negative in emotional tone; only the last theme,  
43 *Keeping going – a changed future*, had a more varied tone, but was extracted from fewer studies  
44 (see Table 3). Nevertheless, it was endorsed by the women with mesh complications who discussed  
45 the findings and described how they directed their anger about their experience into helping other  
46 women with mesh complications, and that meeting other women with similar experience had been  
47 hugely important, far beyond validation of their current difficulties.  
48

49  
50 The destructive impact of mesh complications, and in some cases further impact of mesh removal,  
51 was evident across somatic, emotional, family, social and vocational domains of life, with a deep  
52 sense of irreversible loss. The two themes *Broken body, broken mind*, and *Broken life*, attest to  
53 widespread adverse effects of the pelvic mesh; one of the women reviewing the results commented  
54 that her sense of being female had been destroyed by the experience. When major health problems  
55 occur, people often ask themselves why it happened to them, and whether it could have been  
56 prevented.[37] This provided the basis for the third main theme, *Distrust of doctors and medical*  
57 *industry*. Not only did women feel misinformed about the options for surgery when they first  
58 presented with prolapse or stress incontinence, but also that the risks of surgery had not been  
59 known or communicated to them. Worse, when they experienced complications of mesh, their  
60

1  
2  
3 symptoms and distress were frequently dismissed, even denied, by doctors. A study of surgeons'  
4 reasons for continuing mesh insertion showed a focus on repairing anatomy rather than patient  
5 experience,[38] deflection of blame,[39] and a lack of evidence, since no denominator of total mesh  
6 insertions existed for estimating harms.[40] While doctors themselves had been inadequately  
7 informed of risks by an industry that showed little interest in accurate estimation of outcomes,[40]  
8 many women also experienced their doctors as being uninterested in the outcomes of surgery they  
9 had performed, or (in primary care) recommended. The belief that women imagine, exaggerate, and  
10 fail to manage their symptoms persists throughout healthcare,[41] and these women felt  
11 additionally disqualified because their problems were iatrogenic.  
12

13  
14 From a psychological point of view, the problem of pain was overshadowed by many other mesh-  
15 related symptoms and losses; there was no evidence that as in the standard model, women's  
16 disabilities were the outcome of unwarranted fears for their health and overcautious decisions  
17 about activity, although of course data were not collected specifically to test this model. It would be  
18 a serious error to interpret women's accounts as catastrophic overestimation of threat from  
19 innocuous events.[42] It is not possible to assert on the basis of these findings that pain was a  
20 predominant cause of disability, but it was a common reason for seeking medical help among  
21 women experiencing complications.  
22

### 23 ***Strengths and limitations***

24  
25 There are some limitations to this metasynthesis that arise from characteristics of the studies  
26 included. Despite a search without a language limit, studies were all from high income English-  
27 speaking countries, but enthusiasm for mesh insertion persists in high and middle income  
28 countries.[43] Disclosure of interests was inadequate in several studies, including those that  
29 declared some, and there was a general lack of reflexivity from clinician-researchers about how their  
30 training and outlook might affect their questions and the answers they obtained, particularly when  
31 interviewees were their own patients. There was also little discussion in studies of the problems of  
32 researcher-selected or self-selected participants providing a limited range of concerns, especially  
33 where samples were small. Themes not represented in individual studies could not appear in the  
34 metasynthesis: however, the women with mesh complications who were consulted about the  
35 metasynthesis findings did not identify any major gaps. The women who contributed were all from  
36 the UK: a wider sample would have been desirable. There is always subjectivity in coding and  
37 construction of themes from codes, and a statement of reflexivity and positionality does not remove  
38 subjectivity, only allows readers to judge bias for themselves without a formal measure.  
39

40  
41 We have moderate to high confidence in our findings. Using the CERQual categories of  
42 methodological limitations, coherence of findings, adequacy of data, and relevance of findings,[44]  
43 we note methodological shortcomings in not having a larger team to contribute to the analysis, a  
44 weakness only partly mitigated by involving a group of mesh-injured women, and although samples  
45 in several studies were large and data rich in most, some populations are poorly represented in the  
46 nine included studies, compromising data adequacy.  
47

### 48 ***Implications of the review***

49  
50 The industry implications have been addressed in the national enquiries,[16,36] and by mass legal  
51 action in the USA: permission to extend the use of mesh was far too easily granted,[40,45] and  
52 systematic reporting of adverse effects was weak or absent or relied on legal records.[46] The  
53 clinical shortcomings are summarised as lack of post-marketing surveillance, poor understanding of  
54 the pelvic floor and of pelvic-floor-related disorders, and inadequate medical training of non-mesh  
55 management of POP and SUI.[45] Available information on the internet, when studied in 2019, was  
56 of moderate quality,[13] but it is not known if it is better now. Development and user-testing of  
57 information resources is underway (e.g. [47]) but on a small scale.  
58  
59  
60

1  
2  
3 Other clinical implications are not unique to mesh but concern gender bias in medicine that leads to  
4 disbelief or disregard of women's symptoms, and punitive interactions with women who challenge  
5 routine medical practice or who seek redress. The loss of trust expressed in the studies, and in the  
6 consultation with women with mesh complications, was shocking. It is only in New Zealand that  
7 governmental initiatives have addressed this directly, using restorative justice methods.[25] Lastly,  
8 the standard model of chronic pain disability as arising more in unwarranted fears than in pain itself  
9 fails to describe these findings, and application to pelvic mesh complications would only exacerbate  
10 the gaslighting of women with painful mesh complications.  
11  
12  
13  
14  
15  
16

17 **Acknowledgements:** We recognise the help of our PCAB member, and the courage of the  
18 participants who took part in the discussion of results, sharing their lived expertise, their personal  
19 journeys, and their trauma, in the hope that their voices would generate a deeper understanding in  
20 the literature of the harm done by mesh in the UK. We are grateful to clinicians who gave us their  
21 time, and to our librarian colleague.  
22  
23

24 **Contributors:** AW conceived the study; AW and HM designed the study; HM conducted the  
25 searches; HM and AW screened and extracted studies from the search output; HM and AW  
26 completed COREQ/CASP appraisals and agreed them; HM completed initial coding of studies; AW  
27 and HM combined codes into themes and subthemes; ML and AW consulted women with mesh  
28 about the draft thematic synthesis; AW drafted the paper, HM drafted Figure 1, Tables 1 and 2 and  
29 supplementary information, and ML and HM critically reviewed the paper and gave final approval.  
30 All meet criteria for authorship, and contributions from other colleagues have been acknowledged.  
31  
32

33 **Funding:** Our funding is from the Advanced Pain Discovery Platform, funded by the MRC, Versus  
34 Arthritis, ESRC, BBSRC, Medical Research Foundation, Astra Zeneca, and Eli Lilly: Grant Reference No.  
35 MR/W002426/1; Primary Investigator Professor Geoff Woods, University of Cambridge. The funding  
36 organisations had no role in the design and conduct of the study, collection or analysis of data, or  
37 preparation of the paper.  
38  
39

40 **Competing interests:** All authors have completed the ICMJE disclose form. All declare no financial  
41 support from any industry for the submitted work. AW and HM declare no other relationships or  
42 activities that could appear to have influenced the submitted work; ML declares leading membership  
43 of Mesh Mavericks, an advocacy group for women with pelvic mesh complications.  
44

45 **Ethical approval:** Not required for main study; UCL Research Ethics Committee (ref:2182  
46 Amendment 1) for involvement of women with pelvic mesh complications on interpretation of  
47 results.  
48

49 **Transparency:** All authors affirm that the manuscript is an honest, accurate, and transparent  
50 account of the study being reported; that no important aspects of the study have been omitted; and  
51 that any discrepancies from the study as planned and registered have been explained.  
52  
53

54 **Data availability statement:** Full study-by-study coding is available from the authors on request to  
55 amanda.williams@ucl.ac.uk.  
56  
57  
58

59 The Corresponding Author has the right to grant on behalf of all authors and does grant on behalf of  
60 all authors, a worldwide licence to the Publishers and its licensees in perpetuity, in all forms, formats

1  
2  
3 and media (whether known now or created in the future), to i) publish, reproduce, distribute, display  
4 and store the Contribution, ii) translate the Contribution into other languages, create adaptations,  
5 reprints, include within collections and create summaries, extracts and/or, abstracts of the  
6 Contribution, iii) create any other derivative work(s) based on the Contribution, iv) to exploit all  
7 subsidiary rights in the Contribution, v) the inclusion of electronic links from the Contribution to  
8 third party material where-ever it may be located; and, vi) licence any third party to do any or all of  
9 the above.  
10  
11  
12  
13

## 14 References

- 15 1 Heneghan CJ, Goldacre B, Onakpoya I, et al. Trials of transvaginal mesh devices for pelvic  
16 organ prolapse: a systematic database review of the US FDA approval process. *BMJ Open*  
17 2017;7:e017125. doi: 10.1136/bmjopen-2017-017125  
18  
19 2 Muffly TM, Barber MD. Insertion and removal of vaginal mesh for pelvic organ prolapse. *Clin*  
20 *Obs Gynecol* 2010;53(1):99-114. doi: 10.1097/GRF.0b013e3181cefab8  
21  
22 3 Baessler K, Christmann-Schmid C, Maher C, et al. Surgery for women with pelvic organ  
23 prolapse with or without stress urinary incontinence. *Cochrane Database Syst Rev*  
24 2018;8(8):CD013108. doi: 10.1002/14651858.CD013108.  
25  
26 4 Freitas J, Stewart F, Omar MI, et al. Laparoscopic colposuspension for urinary incontinence in  
27 women. *Cochrane Database Syst Rev* 2019;12(12):CD002239. doi:  
28 10.1002/14651858.CD002239.pub4.  
29  
30 5 Tsiapakidou S, Nygaard CC, Pape J, et al. Evaluation of guidelines on the use of vaginal mesh  
31 implants for pelvic organ prolapse using the AGREE II instrument. *Int J Gynaecol Obstet*  
32 2021;154:400–11. doi: 10.1002/ijgo.13622  
33  
34 6 BBC Panorama. The operation that ruined my life. 2017.  
35 <https://www.youtube.com/watch?v=-mPRns0fG3k>, accessed 07.02.24  
36  
37 7 Yanagisawa, M, Zimmern P. Topix discussion board: A qualitative insight into the lives of  
38 women affected by tape complications. *NeuroUrol Urodyn* 2012;31(2):274-5.  
39  
40 8 Keltie K, Elneil S, Monga A, Patrick H, Powell J, Campbell B, Sims AJ. Complications following  
41 vaginal mesh procedures for stress urinary incontinence: an 8 year study of 92,246 women. *Sci Rep*  
42 2017;7:12015. doi: 10.1038/s41598-017-11821-w  
43  
44 9 Abhyankar P, Uny I, Semple K, et al. Women's experiences of receiving care for pelvic organ  
45 prolapse: a qualitative study. *BMC Womens Health* 2019;19(45). doi: 10.1186/s12905-019-0741-2  
46  
47 10 Hobson DTG, Kinman CL, Gaskins JT, et al. Comparative analyses of attitude, knowledge, and  
48 recollection of preoperative counseling regarding pelvic mesh among women with or without a  
49 mesh-related complication. *Arch Gynecol Obstet* 2021;303:1263-70. doi: 10.1007/s00404-020-  
50 05919-2  
51  
52 11 Loane K, Toozs-Hobson P, Hicks C. Women's experiences of stress incontinence surgery.  
53 *NeuroUrol Urodyn* 2009;28(7):581-2.  
54  
55 12 Oxlad M, Edwards G, McKinlay KA. Patients' perspectives about doctor-patient  
56 communication regarding transvaginal mesh implant surgery. *Patient Educ Couns* 2022;105:3534-9.  
57  
58 13 Furtado Meinberg M, Cardoso Brandão W, Andrade Werneck R, et al. Evaluation of the  
59 quality of information available on the internet on vaginal meshes. *Eur J Obstet Gynecol Reprod Biol*  
60 2021;264:330-35. doi: 10.1016/j.ejogrb.2021.07.055

- 1  
2  
3  
4  
5  
6  
7  
8  
9  
10  
11  
12  
13  
14  
15  
16  
17  
18  
19  
20  
21  
22  
23  
24  
25  
26  
27  
28  
29  
30  
31  
32  
33  
34  
35  
36  
37  
38  
39  
40  
41  
42  
43  
44  
45  
46  
47  
48  
49  
50  
51  
52  
53  
54  
55  
56  
57  
58  
59  
60
- 14 Motamedi M, Carter SM, Degeling C. Women's experiences of and perspectives on transvaginal mesh surgery for stress urine incontinency and pelvic organ prolapse: A Qualitative Systematic Review. *Patient* 2022; 15(2):157-69. doi: 10.1007/s40271-021-00547-7
- 15 Uberoi P, Lee W, Lucioni A, et al. Vaginal Mesh Survivorship. *Curr Bladder Dysfunct Rep* 2020;15(2):93-9. doi: 10.1007/s11884-020-00581-5
- 16 Cumberlege J. First do no harm. The report of the independent medicines and medical devices safety review. 2020. [https://www.immdsreview.org.uk/downloads/IMMDSReview\\_Web.pdf](https://www.immdsreview.org.uk/downloads/IMMDSReview_Web.pdf). Annex J <https://www.immdsreview.org.uk/downloads/Annexes/Annex-J-Personal-testimonies.pdf>. Annex K <https://www.immdsreview.org.uk/downloads/Annexes/Annex-K-Oral-Hearing-Transcripts.pdf>. Accessed 07.02.24.
- 17 Scottish Government. Transvaginal mesh implants independent review: final report 2017 (<https://www.gov.scot/publications/scottish-independent-review-use-safety-efficacy-transvaginal-mesh-implants-treatment-9781786528711/>). Accessed 07.02.24.
- 18 Commonwealth of Australia Senate Community Affairs References Committee. 2018. Report: Number of women in Australia who have had transvaginal mesh implants and related matters. [https://www.aph.gov.au/Parliamentary\\_Business/Committees/Senate/Community\\_Affairs/MeshImplants](https://www.aph.gov.au/Parliamentary_Business/Committees/Senate/Community_Affairs/MeshImplants). Accessed 07.02.24
- 19 Carter P, Fou L, Whiter F, et al. Management of mesh complications following surgery for stress urinary incontinence or pelvic organ prolapse: a systematic review. *BJOG* 2020;127:28–35. doi: 10.1111/1471-0528.15958
- 20 Vlaeyen JWS, Crombez G, Linton SJ. The fear-avoidance model of pain. *Pain* 2016;157(8):1588-9. doi: 10.1097/j.pain.0000000000000574
- 21 Vlaeyen JWS, Linton SJ. Fear-avoidance and its consequences in chronic musculoskeletal pain: a state of the art. *Pain* 2000;85(3):317-32. doi: 10.1016/S0304-3959(99)00242-0
- 22 CASP Critical Appraisal Skills Programme, Qualitative Studies Checklist <https://casp-uk.net/casp-tools-checklists/> accessed 06.02.24
- 23 Booth A, Hannes K, Harden A, et al. COREQ (Consolidated Criteria for Reporting Qualitative Studies). Chapter 21 in Moher D, Altman DG, Schulz KF, Simera I, Wager E (eds): Guidelines for reporting health research: a user's manual. London, UK. John Wiley & Sons 2014:214-26.
- 24 Thomas J, Harden A. Cochrane Training. Thematic Synthesis – Part 1: Thematic synthesis: an overview of its use and features. 2022. <https://www.youtube.com/watch?v=JheRBpXYXC8&t=4s>. Accessed 07.02.24
- 25 Wailling J, Marshall C, Wilkinson J. (2019). Hearing and responding to the stories of survivors of surgical mesh: Ngā kōrero a ngā mōrehu – he urupare (A report for the Ministry of Health). Wellington, New Zealand: The Diana Unwin Chair in Restorative Justice, Victoria University of Wellington.
- 26 Brown J. A thorn in the flesh: the experience of women living with surgical mesh complications. Dissertation, Master of Chaplaincy 2019. <http://hdl.handle.net/10523/9373>. Accessed 07.02.24.
- 27 Brown JL. The experiences of seven women living with pelvic surgical mesh complications. *Int Urogynecol J* 2020;31:823-9. doi: 10.1007/s00192-019-04155-w
- 28 Roos AM, Thakar R, Sultan AH, et al. The impact of pelvic floor surgery on female sexual function: a mixed quantitative and qualitative study. *BJOG* 2014;121:92–101. doi: 10.1111/1471-0528.12412

- 1  
2  
3 29 Oxlad M, Edwards G, McKinlay KA. Patients 'perspective about doctor-patient  
4 communication regarding transvaginal mesh implant surgery. *Patient Educ Couns* 2022;105:3534-9.  
5 doi: 10.1016/j.pec.2022.08.021  
6
- 7 30 Dibb B, Woodgate F, Taylor Y. When things go wrong: experiences of vaginal mesh  
8 complications. *Int Urogynecol J* 2023;34:1575-81. doi: 10.1007/s00192-022-05422-z  
9
- 10 31 Izett-Kay ML, Lumb C, Cartwright R, et al. 'What research was carried out on this vaginal  
11 mesh?' Health-related concerns in women following mesh-augmented prolapse surgery: a thematic  
12 analysis. *BJOG* 2021;128:131-9. doi: 10.1111/1471-0528.16331  
13
- 14 32 Toye F, Izett-Kay M, Barker KL, et al. The experience of women reporting damage from  
15 vaginal mesh: a reflexive thematic analysis. *eClinicalMedicine* 2023;58:101918. doi:  
16 10.1016/j.eclinm.2023.101918  
17
- 18 33 Dunn GE, Hansen BL, Egger MJ, et al. Changed women: the long-term impact of vaginal mesh  
19 complications. *Female Pelvic Med Reconstr Surg* 2014;20:131-6. doi:  
20 10.1097/SPV.0000000000000083  
21
- 22 34 Uberoi P, Lee W, Lucioni A, et al. Listening to women: a qualitative analysis of experiences  
23 after complications from mesh mid-urethral sling surgery. *Urology* 2021;148:106-12. doi:  
24 10.1016/j.urology.2020.11.006  
25
- 26 35 Huntington A, Bramwell E, Sullivan P. The loss of a life well lived: a qualitative study  
27 exploring the impact of surgical mesh implants on the lives of a group of New Zealand women. *Mesh*  
28 *Down Under group*. [https://meshinjuredaustralia.org.au/wp-content/uploads/2019/09/The-](https://meshinjuredaustralia.org.au/wp-content/uploads/2019/09/The-Loss-of-a-Life-Well-Lived-MDU-Research-Report-June-2019.pdf)  
29 [Loss-of-a-Life-Well-Lived-MDU-Research-Report-June-2019.pdf](https://meshinjuredaustralia.org.au/wp-content/uploads/2019/09/The-Loss-of-a-Life-Well-Lived-MDU-Research-Report-June-2019.pdf). Accessed 07.02.24  
30
- 31 36 McKinlay KA, Oxlad M. 'I have no life and neither do the ones watching me suffer': women's  
32 experiences of transvaginal mesh implant surgery. *Psychol Health* 2022;1-22. doi:  
33 10.1080/08870446.2022.2125513  
34
- 35 37 Hagger MS, Orbell S. The common sense model of illness self-regulation: a conceptual  
36 review and proposed extended model. *Health Psychol Rev* 2022;16(3):347-377. doi:  
37 10.1080/17437199.2021.1878050  
38
- 39 38 Ducey A, Donoso C, Ross S, et al. From anatomy to patient experience in pelvic floor surgery:  
40 Mindlines, evidence, responsibility, and transvaginal mesh. *Soc Sci Med* 2020;260:113151. doi:  
41 10.1016/j.socscimed.2020.113151  
42
- 43 39 Lee W, Uberoi P, Berry DL, et al. The evolving story of mesh mid-urethral sling: Surgeon's  
44 insights into the patient experience and outcomes. *Female Pelvic Med Reconstr Surg* 2020;26(10  
45 Suppl 1):S136.  
46
- 47 40 Leiter V, White SK. Enmeshed in controversy: Claims about the risks of vaginal mesh devices.  
48 *Health Risk Soc* 2015;17(1):64-80. doi: 10.1080/13698575.2014.1000835  
49
- 50 41 Criado-Perez C. Invisible women: exposing data bias in a world designed for men. London,  
51 UK. Vintage (Chatto & Windus) 2019.  
52
- 53 42 Gatchel RJ, Peng YB, Peters ML, et al. The biopsychosocial approach to chronic pain:  
54 Scientific advances and future directions. *Psychol Bull* 2007;133(4):581-624. doi: 10.1037/0033-  
55 2909.133.4.581  
56
- 57 43 Ruffolo AF, Lallemand M, Delplanque S, et al. The transvaginal mesh: an overview of  
58 indications and contraindications for its use. *Expert Rev Med Devices* 2023;20(5):393-400. doi:  
59 10.1080/17434440.2023.2199926  
60



- 1  
2  
3 44 Lewin S, Booth A, Glenton C, et al. Applying GRADE-CERQual to qualitative evidence  
4 synthesis findings: introduction to the series. *Implement Sci* 2018;13(Suppl 1):2. doi:  
5 10.1186/s13012-017-0688-3  
6  
7 45 Mangir N, Dikici BA, Chapple CR, et al. Landmarks in vaginal mesh development:  
8 polypropylene mesh for treatment of SUI and POP. *Nature Rev* 2019;16:675-89. doi:  
9 10.1038/s41585-019-0230-2  
10  
11 46 Souder CP, Anger JT, Wood LN, et al. The influence of mesh litigation on reporting in the  
12 MAUDE database. *Neurourol Urodyn* 2016;35:S57-S57.  
13  
14 47 Angelova N, Taylor L, McKee L, et al. User testing a patient information resource about  
15 potential complications of vaginally inserted synthetic mesh. *BMC Womens Health* 2021;21:35. doi:  
16 10.1186/s12905-020-01166-4  
17  
18  
19  
20  
21  
22  
23  
24  
25  
26  
27  
28  
29  
30  
31  
32  
33  
34  
35  
36  
37  
38  
39  
40  
41  
42  
43  
44  
45  
46  
47  
48  
49  
50  
51  
52  
53  
54  
55  
56  
57  
58  
59  
60

1  
2  
3  
4  
5  
6  
7  
8  
9  
10  
11  
12  
13  
14  
15  
16  
17  
18  
19  
20  
21  
22  
23  
24  
25  
26  
27  
28  
29  
30  
31  
32  
33  
34  
35  
36  
37  
38  
39  
40  
41  
42  
43  
44  
45  
46  
47  
48  
49  
50  
51  
52  
53  
54  
55  
56  
57  
58  
59  
60

For peer review only

Table 1. Characteristics of included studies

| Author, date of publication, author details, financial interests                                                                                | Title                                                                                                                                                 | Research focus                                                     | Recruitment                                                | Sample size                                                   | Data collection method                                             |
|-------------------------------------------------------------------------------------------------------------------------------------------------|-------------------------------------------------------------------------------------------------------------------------------------------------------|--------------------------------------------------------------------|------------------------------------------------------------|---------------------------------------------------------------|--------------------------------------------------------------------|
| Brown 2020[27]<br>F nurse with lived experience of mesh.<br>No financial interests.                                                             | The experiences of seven women living with pelvic surgical mesh complications                                                                         | Lived experience                                                   | Women attending physiotherapy                              | 7                                                             | Semi-structured interview                                          |
| Cumberlege (chair) 2020,[16] F politician and life peer; panel M physician, M communication consultant, F secretary.<br>No financial interests. | First do no harm: the report of the Independent Medicines and Medical Devices Safety Review                                                           | Adverse experiences, information useful for making recommendations | Mesh patient groups, affected individuals including carers | Unclear: >100                                                 | Independent inquiry: patient engagement events, feedback on drafts |
|                                                                                                                                                 | Annex J: Personal testimonies                                                                                                                         |                                                                    |                                                            | Unclear: >10                                                  | Written                                                            |
|                                                                                                                                                 | Annex K: Oral hearing transcripts                                                                                                                     |                                                                    |                                                            | 5 women with mesh, 1 carer, 12 mesh group reps; 10 clinicians | Oral accounts in hearings; transcribed, plus one letter            |
| Dibb et al. 2023,[30] all 3 F health researchers.<br>No financial interests.                                                                    | When things go wrong: experiences of vaginal mesh complications                                                                                       | Complications of mesh and their impact                             | Mesh support group on social media                         | 18                                                            | Semi-structured interview                                          |
| Dunn et al. 2014,[33] all 7 F doctors or nurses mainly in urogynaecology.<br>No financial interests.                                            | Changed women: the long-term impact of vaginal mesh complications                                                                                     | Women's experience of mesh complications after specialist care     | Urogynaecology clinic for mesh complications               | 84                                                            | Structured telephone interview                                     |
| Huntington et al. 2019,[35] 2 F health researchers, 1 F mesh group advocate.<br>No declaration of interest.                                     | The loss of a life well lived: a qualitative study exploring the impact of surgical mesh implants on the lives of a group of New Zealand women        | Impact of mesh complications                                       | Mesh support group through health advocate                 | 23                                                            | E-mailed account                                                   |
| Izett-Kay et al. 2020,[31] 5 M surgeons, 1 F consultant, 1 F medical researcher.<br>3 disclosed financial interests.                            | 'What research was carried out on this vaginal mesh?' Health-related concerns in women following mesh-augmented prolapse surgery: a thematic analysis | Health problems after mesh insertion                               | Patients of 5 surgeons                                     | 752                                                           | Free text responses on written/online questionnaire                |

|                                                                                                     |                                                                                                                       |                                                                            |                                                                                                                            |     |                                                     |
|-----------------------------------------------------------------------------------------------------|-----------------------------------------------------------------------------------------------------------------------|----------------------------------------------------------------------------|----------------------------------------------------------------------------------------------------------------------------|-----|-----------------------------------------------------|
| McKinlay, Oxlad 2022,[36] 2 F health researchers. No financial interests                            | 'I have no life and neither do the ones watching me suffer': women's experiences of transvaginal mesh implant surgery | Impact of mesh, taking biopsychosocial perspective                         | Written submissions from national inquiry into mesh                                                                        | 153 | Free text from submissions                          |
| Toye et al. 2023,[32] 3 health researchers, 1 M surgeon. No financial interests.                    | The experience of women reporting damage from vaginal mesh: a reflexive thematic analysis                             | Explore and understand the experience of living with complications of mesh | Women being treated for urogynaecological conditions through healthcare, advocacy groups, advertisement, snowball sampling | 15  | Semi-structured interviews, telephone or video call |
| Uberoi et al. 2021,[34] 1 M & 2 F surgeons, 1 M urologist, 2 F researchers. No financial interests. | Listening to women: a qualitative analysis of experiences after complications from mesh mid-urethral sling surgery    | Understand women's experiences after mesh revision                         | Patients of 3 surgeons                                                                                                     | 19  | Semi-structured interviews & focus groups           |

Key: F female, M male.

**Table 2. Thematic analysis**

The main themes are in **bold and underlined**. Subthemes use as heading a *quotation* from a mesh-affected woman in one of the studies

Subthemes show constituent codes, the most frequently occurring in **bold**, and the least frequent in *grey*. Positive comments that belong in the code are prefixed and suffixed by a '+’.

### **Broken body, broken mind**

“my life is never going to be the same”

- **this is my life now, 'new normal'**
- **permanent problem, ruined life, reduced quality of life**
- impact on identity, changed as a person, perspective changed, life on hold, lack of fulfilment
- **chronic pain**, descriptions of extreme pain, lower back pain
- not able to function, lost trust in body, feeling broken
- grief, loss, feeling robbed
- bladder problems, pain, dysfunction, discharge, repeated infections, abnormal bleeding, bowel problems, incontinence; practical issues associated with bleeding, discharge, incontinence
- comorbidities, cascading health issues, fatigue, tiredness, consequences of medication, sleep disruption, weight gain
- shame, embarrassment, loss of confidence, impact on self-esteem, hopelessness

“I can't achieve very much”

- **being or doing less than before surgery**
- activity and physical limitations, loss of mobility, daily difficulties, limitations on daily life, worsening after activity, not being able to sit or stand, not being able to do housework, restriction on travel
- disability, feeling like a burden, loss of independence

“It has left me feeling lost, extremely anxious”

- **anxiety, mental health affected, distress, suicidal feelings**, depression, feelings of frustration and anger, emotional volatility, 'emotional wreck', guilt, self-blame, unhealthy coping mechanisms e.g. alcohol
- having psychological treatment, counselling, therapy

“You can't have that [sexual] relationship with someone screaming in pain”

- loss of intimacy, impact on sex affecting relationship, penetrative sex as impossible, dyspareunia
- generic sexual problems, avoidance of sex
- partner feels mesh during sex [validating]

### **Linked to both broken body and distrust of doctors**

“I am frightened if I take it out; I am frightened if I don't”

- **fear of future problems and future surgery**, uncertain future
- multiple operations or hospitalisation to fix subsequent problems, wishing for mesh removal, remaining mesh, mesh as alien, foreign in the body, mesh erosion

### **Distrust of doctors and medical industry**

“She suggested that it was such an easy fix”

- **feeling misinformed about some or all risks, not knowing, being lied to**, 'quick fix', benefits overstated, lack of informed consent and informed choice, feeling 'sold' on mesh, regret surgery

- 1  
2  
3  
4  
5  
6  
7  
8  
9  
10  
11  
12  
13  
14  
15  
16  
17  
18  
19  
20  
21  
22  
23  
24  
25  
26  
27  
28  
29  
30
- lacked or wanted more discussion of alternatives to surgery
  - preoperative expectations of improvement after surgery, recovery taking longer/being harder than expected
  - feeling dehumanised, 'human guinea pigs'
- "you're the only person I've seen who is complaining and thinking you have problems"
- **dismissal of patient concerns, 'it's all in your head', 'there is nothing wrong with you'**
  - doctors not taking responsibility for the problem, doctors not giving attention needed, lack of empathy, insensitive medical professionals
  - doctors blaming women
- "I trusted fully all I was told" / "I was in a very vulnerable position and felt unable to say no."
- **trust lost**
  - **should not have put trust in doctor, importance of patient - provider relationship, power dynamic in patient-doctor relationship**
- "All that I ask is honesty"
- health system as understandably fallible - no time, doctors as people - etc; wanting more transparency, wanting acknowledgement of what has happened
  - adverse event need to be logged, problems with mesh described as 'unusual' by doctors, medical professionals needing more education on mesh
  - looking for information. +positive interactions with medical professionals+
- "I have beaten cancer, but mesh [has] beaten me"
- **victims of mesh, medical companies**
  - trauma, medical trauma, PTSD, mesh should be banned
  - danger - potentially fatal
  - litigation, financial compensation desired, battle to obtain financial compensation

### **Broken life**

"My children needed their mother back"

- **relationship with grandchildren and children affected**, impact on family, relationship with partner affected, dynamic changed
- +family is reason for living, my family and friends keep me going; support from partner+
- unsupported by partner, breakdown of relationship with partner

"people get bored with it, and they're not interested, and you sort of get dropped"

- **isolation, loneliness**
- **not being listened to, not being believed**, suffering in silence, people don't want to hear about it,
- social relationships and friendships affected, social life affected, preventing new potential relationships

- "I am unable to work ... I miss being able to contribute".

- impact on career, loss of job, having to take time off work, financial burden of being able to work
- financial burden of treatment, medication, supplies

### **Keeping going - 'a changed future'**

- wanting to help others, concern for others with mesh complications, being able to relate to others with the same condition
- +successful mesh experience+, how women judge their surgery, what is judged as success
- +positives that have come from vaginal mesh; positive hopes for the future+
- vaginal mesh community being upsetting

**Table 3. Coverage of themes and subthemes by studies**

|                                                                                      | Brown [27] | Cumberlege [16] | Dibb [30] | Dunn [33] | Huntington [35] | Izett-Kay[31] | McKinlay [36] | Toye [32] | Uberoi [34] |
|--------------------------------------------------------------------------------------|------------|-----------------|-----------|-----------|-----------------|---------------|---------------|-----------|-------------|
| <b>Broken body, broken mind</b>                                                      |            |                 |           |           |                 |               |               |           |             |
| "My life is never going to be the same"                                              | y          | y               | y         | y         | y               | y             | y             | y         | y           |
| "I can't achieve very much"                                                          | y          | y               | y         | y         | y               | y (+)         | y             | y         | y           |
| "It has left me feeling lost, extremely anxious"                                     | -          | y               | y         | y         | y               | y             | y             | y         | y           |
| "You can't have that [sexual] relationship with someone screaming in pain"           | y          | y               | y         | y         | y               | -             | y             | y         | Y           |
| <b>Linked to both broken body and distrust of doctors</b>                            |            |                 |           |           |                 |               |               |           |             |
| "I am frightened if I take it out; I am frightened if I don't"                       | y          | y               | y         | y         | y               | y             | y             | y         | Y           |
| <b>Distrust of doctors and medical industry</b>                                      |            |                 |           |           |                 |               |               |           |             |
| "She suggested that it was such an easy fix"                                         | y          | y               | y         | y         | y               | y             | y             | y         | Y           |
| "You're the only person I've seen who is complaining and thinking you have problems" | y          | y               | y         | y         | y               | y             | y             | y         | Y           |
| "I trusted fully all I was told"                                                     | y          | y               | y         | y         | y               | -             | -             | y         | Y           |

|                                                                                                          |                                                                                     |   |       |   |   |   |       |   |       |       |
|----------------------------------------------------------------------------------------------------------|-------------------------------------------------------------------------------------|---|-------|---|---|---|-------|---|-------|-------|
| 1<br>2<br>3<br>4<br>5<br>6<br>7<br>8<br>9<br>10<br>11<br>12                                              | “All that I ask is honesty”                                                         | y | y (+) | - | y | y | y (+) | - | y (+) | y (+) |
| 13                                                                                                       | <b>Broken life</b>                                                                  |   |       |   |   |   |       |   |       |       |
| 14<br>15<br>16<br>17<br>18<br>19<br>20<br>21<br>22<br>23<br>24<br>25<br>26<br>27<br>28<br>29<br>30<br>31 | “I have beaten cancer, but mesh [has] beaten me”                                    | y | y     | y | y | y | y     | y | y     | Y     |
| 32<br>33<br>34<br>35<br>36<br>37<br>38<br>39                                                             | “My children needed their mother back”                                              | y | y     | y | - | y | -     | y | y     | Y     |
| 40<br>41<br>42<br>43<br>44                                                                               | “People get bored with it, and they’re not interested, and you sort of get dropped” | y | -     | y | y | y | -     | y | y     | Y     |
| 45<br>46<br>47<br>48<br>49<br>50<br>51<br>52<br>53<br>54<br>55<br>56<br>57<br>58<br>59<br>60             | “I am unable to work ... I miss being able to contribute”                           | y | y     | - | y | y | -     | y | y     | -     |
|                                                                                                          | <b>Keeping going - ‘a changed future’</b>                                           | - | y     | y | y | y | y     | - | y     | y (+) |

+ = positive aspects e.g. positive interactions with medical professionals.



Figure 1

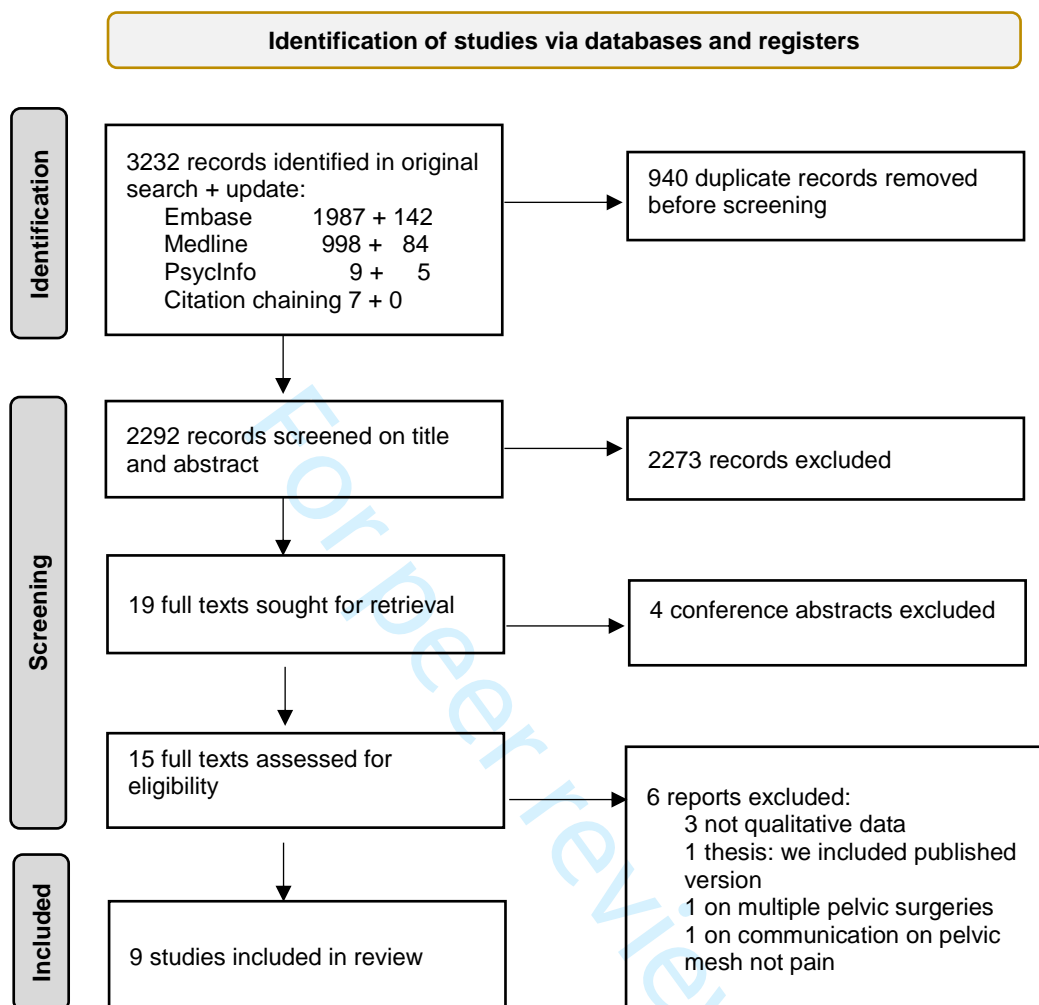

**Supplementary data****Search terms**

The search terms used for each database were:

1. quality of life.ab,ti.
2. experience.ab,ti.
3. survey.ab,ti.
4. qualitative.ab,ti.
5. 1 or 2 or 3 or 4
6. Pelvic organ prolapse.mp. or Pelvic Organ Prolapse/
7. Surgical mesh.mp. or Surgical Mesh/
8. 6 and 7
9. Vaginal mesh.mp
10. Transvaginal mesh.mp
11. TVT.mp or transvaginal tape.mp
12. 8 or 9 or 10 or 11
13. 5 and 12

For peer review only

Table: Amalgamated CASP and COREQ quality appraisal

| Domain/item & guide questions / Studies | Interviewer/facilitator, training, relationship with interviewees                                             | Methodological orientation or theory                           | Method appropriate to aims? | Interview guide                        | Rigour and reflexivity of analysis                                                                                                | Derivation of themes | Statement of findings                                                                    |
|-----------------------------------------|---------------------------------------------------------------------------------------------------------------|----------------------------------------------------------------|-----------------------------|----------------------------------------|-----------------------------------------------------------------------------------------------------------------------------------|----------------------|------------------------------------------------------------------------------------------|
| Brown 2020 [27]                         | Sole author; nurse & lived experience of mesh. No relationship but experience disclosed to interviewees.      | Hermeneutic phenomenology; interpretation of lived experience. | Yes                         | No detail                              | Used framework; single coder; respondent validation; some reflexivity.                                                            | From data.           | Largely descriptive, but met aims.                                                       |
| Cumberlege (chair) 2020 [16]            | Independent enquiry. Panel asked questions; written testimonies also used. No relationship with interviewees. | Legal: evidence gathering.                                     | Yes                         | N/A but full transcript.               | N/A: no data analysis.                                                                                                            | N/A                  | Full summary of findings, and women with mesh complications involved in recommendations. |
| Dibb et al. 2023 [30]                   | One author; no details of training or relationship with interviewees.                                         | Thematic analysis.                                             | Yes                         | Some detail                            | Little detail; some themes are close to question topics; some reflexivity.                                                        | From data.           | Positive and negative aspects described and extensive use of quotations.                 |
| Dunn et al. 2014 [33]                   | Two researchers; no further detail.                                                                           | Qualitative description, no inference.                         | Yes                         | Two open-ended questions supplied.     | Multiple coders & respondent validation; little description of analytic process; no interpretation by design; little reflexivity. | From data.           | Describes women's experience in three trajectories.                                      |
| Huntington et al. 2019 [35]             | No interview: women submitted personal accounts.                                                              | Inductive: thematic analysis                                   | Yes                         | Prompts for written account described. | Little description but thematic analysis method used; no mention of reflexivity.                                                  | From data.           | Answer research questions but without critical analysis.                                 |

1  
2  
3  
4  
5  
6  
7  
8  
9  
10  
11  
12  
13  
14  
15  
16  
17  
18  
19  
20  
21  
22  
23  
24  
25  
26  
27  
28  
29  
30  
31  
32  
33  
34  
35  
36  
37  
38  
39  
40  
41  
42  
43  
44  
45  
46

|                            |                                                                                                            |                                                         |     |                                                             |                                                                                                                          |                                          |                                                                                                |
|----------------------------|------------------------------------------------------------------------------------------------------------|---------------------------------------------------------|-----|-------------------------------------------------------------|--------------------------------------------------------------------------------------------------------------------------|------------------------------------------|------------------------------------------------------------------------------------------------|
| Izett-Kay et al. 2020 [31] | Free text on postal questionnaire or phone sampling. Some respondents might have been patients of authors. | “Interpretivist” approach; inductive; thematic analysis | Yes | Single question supplied.                                   | Two coders and team discussion; little description of analysis; no reflexivity but mention of possible unconscious bias. | From data.                               | Findings clearly described; theme titles not very descriptive.                                 |
| McKinlay & Oxlad 2022 [36] | Written submissions to government enquiry. No relationship.                                                | Deductive and inductive thematic analysis.              | Yes | N/A                                                         | Detailed description of analysis, using biopsychosocial framework. No reflexivity by design.                             | From data, then grouped.                 | Clearly reported with recommendations.                                                         |
| Toye et al. 2023 [32]      | Data collection described in related paper; no details of interviewers or possible relationship.           | Reflexive thematic analysis.                            | Yes | Example questions in text, developed with PPI contribution. | Detailed description: multiple coders; PPI involvement in analysis; reflexivity described.                               | From data.                               | Full account with supplementary data; interpretation of findings to draw higher level lessons. |
| Uberoi et al. 2021 [34]    | Data collection by trained and experienced authors, avoiding those who knew interviewees.                  | Deductive and inductive content analysis.               | Yes | Interview guide supplied.                                   | Detailed description; multiple coders; no mention of reflexivity.                                                        | From data, grouped by interview prompts. | Themes literal rather than latent meanings, perhaps because used prompts as themes.            |

Key: N/A not application; PPI patient and public involvement

## ENTREQ checklist

| Item                       | Guide and description                                                                                                                                                                                                                                                                                                                                                                                           | Reported on page #                               |
|----------------------------|-----------------------------------------------------------------------------------------------------------------------------------------------------------------------------------------------------------------------------------------------------------------------------------------------------------------------------------------------------------------------------------------------------------------|--------------------------------------------------|
| Aim                        | State the research question the synthesis addresses                                                                                                                                                                                                                                                                                                                                                             | Abstract p2, Introduction p3                     |
| Synthesis methodology      | Identify the synthesis methodology or theoretical framework which underpins the synthesis, and describe the rationale for choice of methodology (e.g. meta-ethnography, thematic synthesis, critical interpretive synthesis, grounded theory synthesis, realist synthesis, meta-aggregation, meta-study, framework synthesis).                                                                                  | Data synthesis p4                                |
| Approach to searching      | Indicate whether the search was pre-planned (comprehensive search strategies to seek all available studies) or iterative (to seek all available concepts until theoretical saturation is achieved).                                                                                                                                                                                                             | Search strategy p3                               |
| Inclusion criteria         | Specify the inclusion/exclusion criteria (e.g. in terms of population, language, year limits, type of publication, study type).                                                                                                                                                                                                                                                                                 | Inclusion and exclusion criteria, p3             |
| Data sources               | Describe the information sources used (e.g. electronic databases (MEDLINE, EMBASE, CINAHL, psychINFO, Econlit), grey literature databases (digital thesis, policy reports), relevant organisational websites, experts, information specialists, generic web searches (Google Scholar), hand searching, reference lists) and when the searches were conducted; provide the rationale for using the data sources. | Search strategy, p3                              |
| Electronic search strategy | Describe the literature search (e.g. provide electronic search strategies with population terms, clinical or health topic terms, experiential or social phenomena related terms, filters for qualitative research and search limits).                                                                                                                                                                           | Supplementary data                               |
| Study screening methods    | Describe the process of study screening and sifting (e.g. title, abstract and full text review, number of independent reviewers who screened studies)                                                                                                                                                                                                                                                           | Study selection p4                               |
| Study characteristics      | Present the characteristics of the included studies (e.g. year of publication, country, population, number of participants, data collection, methodology, analysis, research questions).                                                                                                                                                                                                                        | Table 1, p14-15                                  |
| Study selection results    | Identify the number of studies screened and provide reasons for study exclusion (e.g. for comprehensive searching, provide numbers of studies screened and reasons for exclusion indicated in a figure/flowchart; for iterative searching describe reasons for study exclusion and inclusion based on modifications to the research question and/or contribution to theory development).                        | Figure 1, and Results p4-5                       |
| Rationale for appraisal    | Describe the rationale and approach used to appraise the included studies or selected findings (e.g. assessment of conduct (validity and robustness), assessment of reporting (transparency), assessment of content and utility of the findings).                                                                                                                                                               | Evaluation of studies, p4; CERQual categories p8 |
| Appraisal items            | State the tools, frameworks and criteria used to appraise the studies or selected findings (e.g. Existing tools: CASP, QARI, COREQ, Mays and Pope [25]; reviewer developed tools; describe the domains assessed: research team, study design, data analysis and interpretations, reporting).                                                                                                                    | Combined CASP and COREQ, Table 2 and p5-6        |

|    |                      |                                                                                                                                                                                                                                                      |
|----|----------------------|------------------------------------------------------------------------------------------------------------------------------------------------------------------------------------------------------------------------------------------------------|
| 1  |                      |                                                                                                                                                                                                                                                      |
| 2  |                      |                                                                                                                                                                                                                                                      |
| 3  |                      |                                                                                                                                                                                                                                                      |
| 4  | Appraisal process    | Indicate whether the appraisal was conducted independently by more than one reviewer and if consensus was required.                                                                                                                                  |
| 5  |                      | Evaluation of studies p4                                                                                                                                                                                                                             |
| 6  | Appraisal results    | Present results of the quality assessment and indicate which articles, if any, were weighted/excluded based on the assessment and give the rationale.                                                                                                |
| 7  |                      | Aims & methods of included studies pp5-6 & supplementary data                                                                                                                                                                                        |
| 8  |                      |                                                                                                                                                                                                                                                      |
| 9  |                      |                                                                                                                                                                                                                                                      |
| 10 |                      |                                                                                                                                                                                                                                                      |
| 11 | Data extraction      | Indicate which sections of the primary studies were analysed and how were the data extracted from the primary studies? (e.g. all text under the headings "results /conclusions" were extracted electronically and entered into a computer software). |
| 12 |                      | Data synthesis p4                                                                                                                                                                                                                                    |
| 13 |                      |                                                                                                                                                                                                                                                      |
| 14 |                      |                                                                                                                                                                                                                                                      |
| 15 |                      |                                                                                                                                                                                                                                                      |
| 16 | Software             | State the computer software used, if any.                                                                                                                                                                                                            |
| 17 |                      | Data synthesis, p4                                                                                                                                                                                                                                   |
| 18 | Number of reviewers  | Identify who was involved in coding and analysis                                                                                                                                                                                                     |
| 19 |                      | Data synthesis, p4; Patient and public involvement, p4                                                                                                                                                                                               |
| 20 |                      |                                                                                                                                                                                                                                                      |
| 21 | Coding               | Describe the process for coding of data (e.g. line by line coding to search for concepts).                                                                                                                                                           |
| 22 |                      | Data synthesis, p4                                                                                                                                                                                                                                   |
| 23 | Study comparison     | Describe how were comparisons made within and across studies (e.g. subsequent studies were coded into pre-existing concepts, and new concepts were created when deemed necessary).                                                                   |
| 24 |                      | Data synthesis p4                                                                                                                                                                                                                                    |
| 25 |                      |                                                                                                                                                                                                                                                      |
| 26 |                      |                                                                                                                                                                                                                                                      |
| 27 | Derivation of themes | Explain whether the process of deriving the themes or constructs was inductive or deductive.                                                                                                                                                         |
| 28 |                      | Data synthesis p4                                                                                                                                                                                                                                    |
| 29 | Quotations           | Provide quotations from the primary studies to illustrate themes/constructs, and identify whether the quotations were participant quotations or the author's interpretation                                                                          |
| 30 |                      | Table 3 uses direct quotations from primary studies as sub-theme titles                                                                                                                                                                              |
| 31 |                      |                                                                                                                                                                                                                                                      |
| 32 |                      |                                                                                                                                                                                                                                                      |
| 33 | Synthesis output     | Present rich, compelling and useful results that go beyond a summary of the primary studies (e.g. new interpretation, models of evidence, conceptual models, analytical framework, development of a new theory or construct).                        |
| 34 |                      | Discussion pp7-8                                                                                                                                                                                                                                     |
| 35 |                      |                                                                                                                                                                                                                                                      |
| 36 |                      |                                                                                                                                                                                                                                                      |
| 37 |                      |                                                                                                                                                                                                                                                      |
| 38 |                      |                                                                                                                                                                                                                                                      |
| 39 |                      |                                                                                                                                                                                                                                                      |
| 40 |                      |                                                                                                                                                                                                                                                      |
| 41 |                      |                                                                                                                                                                                                                                                      |
| 42 |                      |                                                                                                                                                                                                                                                      |
| 43 |                      |                                                                                                                                                                                                                                                      |
| 44 |                      |                                                                                                                                                                                                                                                      |
| 45 |                      |                                                                                                                                                                                                                                                      |
| 46 |                      |                                                                                                                                                                                                                                                      |
| 47 |                      |                                                                                                                                                                                                                                                      |
| 48 |                      |                                                                                                                                                                                                                                                      |
| 49 |                      |                                                                                                                                                                                                                                                      |
| 50 |                      |                                                                                                                                                                                                                                                      |
| 51 |                      |                                                                                                                                                                                                                                                      |
| 52 |                      |                                                                                                                                                                                                                                                      |
| 53 |                      |                                                                                                                                                                                                                                                      |
| 54 |                      |                                                                                                                                                                                                                                                      |
| 55 |                      |                                                                                                                                                                                                                                                      |
| 56 |                      |                                                                                                                                                                                                                                                      |
| 57 |                      |                                                                                                                                                                                                                                                      |
| 58 |                      |                                                                                                                                                                                                                                                      |
| 59 |                      |                                                                                                                                                                                                                                                      |
| 60 |                      |                                                                                                                                                                                                                                                      |
