# Supplementary material for: Pain and other complications of pelvic mesh: a systematic review of qualitative studies and thematic synthesis of women’s accounts
Source: PubMed Central journal article supplement (PMC11149113; doi:10.1136/bmjopen-2024-085879), 2024-06-03
Supplement: bmjopen-2024-085879supp001.pdf [file bmjopen-2024-085879supp001.pdf]

## Supplementary data

### Search terms

The search terms used for each database were:

1. quality of life.ab,ti.
2. experience.ab,ti.
3. survey.ab,ti.
4. qualitative.ab,ti.
5. 1 or 2 or 3 or 4
6. Pelvic organ prolapse.mp. or Pelvic Organ Prolapse/
7. Surgical mesh.mp. or Surgical Mesh/
8. 6 and 7
9. Vaginal mesh.mp
10. Transvaginal mesh.mp
11. TVT.mp or transvaginal tape.mp
12. 8 or 9 or 10 or 11
13. 5 and 12

**Table: Amalgamated CASP and COREQ quality appraisal**

| <b>Domain/item &amp; guide questions / Studies</b> | <b>Interviewer/facilitator, training, relationship with interviewees</b>                                      | <b>Methodological orientation or theory</b>                    | <b>Method appropriate to aims?</b> | <b>Interview guide</b>                 | <b>Rigour and reflexivity of analysis</b>                                                                                         | <b>Derivation of themes</b> | <b>Statement of findings</b>                                                             |
|----------------------------------------------------|---------------------------------------------------------------------------------------------------------------|----------------------------------------------------------------|------------------------------------|----------------------------------------|-----------------------------------------------------------------------------------------------------------------------------------|-----------------------------|------------------------------------------------------------------------------------------|
| Brown 2020 [27]                                    | Sole author; nurse & lived experience of mesh. No relationship but experience disclosed to interviewees.      | Hermeneutic phenomenology; interpretation of lived experience. | Yes                                | No detail                              | Used framework; single coder; respondent validation; some reflexivity.                                                            | From data.                  | Largely descriptive, but met aims.                                                       |
| Cumberlege (chair) 2020 [16]                       | Independent enquiry. Panel asked questions; written testimonies also used. No relationship with interviewees. | Legal: evidence gathering.                                     | Yes                                | N/A but full transcript.               | N/A: no data analysis.                                                                                                            | N/A                         | Full summary of findings, and women with mesh complications involved in recommendations. |
| Dibb et al. 2023 [30]                              | One author; no details of training or relationship with interviewees.                                         | Thematic analysis.                                             | Yes                                | Some detail                            | Little detail; some themes are close to question topics; some reflexivity.                                                        | From data.                  | Positive and negative aspects described and extensive use of quotations.                 |
| Dunn et al. 2014 [33]                              | Two researchers; no further detail.                                                                           | Qualitative description, no inference.                         | Yes                                | Two open-ended questions supplied.     | Multiple coders & respondent validation; little description of analytic process; no interpretation by design; little reflexivity. | From data.                  | Describes women's experience in three trajectories.                                      |
| Huntington et al. 2019 [35]                        | No interview: women submitted personal accounts.                                                              | Inductive: thematic analysis                                   | Yes                                | Prompts for written account described. | Little description but thematic analysis method used; no mention of reflexivity.                                                  | From data.                  | Answer research questions but without critical analysis.                                 |

|                            |                                                                                                            |                                                         |     |                                                             |                                                                                                                          |                                          |                                                                                                |
|----------------------------|------------------------------------------------------------------------------------------------------------|---------------------------------------------------------|-----|-------------------------------------------------------------|--------------------------------------------------------------------------------------------------------------------------|------------------------------------------|------------------------------------------------------------------------------------------------|
| Izett-Kay et al. 2020 [31] | Free text on postal questionnaire or phone sampling. Some respondents might have been patients of authors. | “Interpretivist” approach; inductive; thematic analysis | Yes | Single question supplied.                                   | Two coders and team discussion; little description of analysis; no reflexivity but mention of possible unconscious bias. | From data.                               | Findings clearly described; theme titles not very descriptive.                                 |
| McKinlay & Oxlad 2022 [36] | Written submissions to government enquiry. No relationship.                                                | Deductive and inductive thematic analysis.              | Yes | N/A                                                         | Detailed description of analysis, using biopsychosocial framework. No reflexivity by design.                             | From data, then grouped.                 | Clearly reported with recommendations.                                                         |
| Toye et al. 2023 [32]      | Data collection described in related paper; no details of interviewers or possible relationship.           | Reflexive thematic analysis.                            | Yes | Example questions in text, developed with PPI contribution. | Detailed description: multiple coders; PPI involvement in analysis; reflexivity described.                               | From data.                               | Full account with supplementary data; interpretation of findings to draw higher level lessons. |
| Uberoi et al. 2021 [34]    | Data collection by trained and experienced authors, avoiding those who knew interviewees.                  | Deductive and inductive content analysis.               | Yes | Interview guide supplied.                                   | Detailed description; multiple coders; no mention of reflexivity.                                                        | From data, grouped by interview prompts. | Themes literal rather than latent meanings, perhaps because used prompts as themes.            |

Key: N/A not application; PPI patient and public involvement
